# Supplementary material
Source: PubMed Central journal article supplement (PMC8886448)
Supplement: jamaneurol-e215598-s001.pdf [file jamaneurol-e215598-s001.pdf]

## Supplemental Online Content

Hoiland RL, Rikhranj KJK, Thiara S, et al. Neurologic prognostication after cardiac arrest using brain biomarkers: a systematic review and meta-analysis. *JAMA Neurol*. Published online February 28, 2022. doi: 10.1001/jamaneurol.2021.5598

**eAppendix 1.** Detailed Methods

**eAppendix 2.** Search Strategy for MEDLINE

**eAppendix 3.** Outline of Data Inclusion for Studies With Duplicated Data

**eAppendix 4.** QUADAS-2 Results

**eFigure 1.** Receiver Operator Characteristic Curves for the Diagnostic Accuracy of Brain Biomarkers Post ROSC for Predicting Unfavorable Outcome at 24 hours.

**eFigure 2.** Receiver Operator Characteristic Curves for the Diagnostic Accuracy of Brain Biomarkers Post ROSC for Predicting Unfavorable Outcome at 72 hours.

**eFigure 3.** Receiver Operator Characteristic Curves for the Diagnostic Accuracy of Brain Biomarkers for Predicting Unfavorable outcome at 48 hours in patients that underwent targeted temperature management.

**eFigure 4.** Group Differences in Brain Biomarkers Between Patients That Underwent TTM with Favorable and Unfavorable Neurological Outcome.

**eFigure 5.** Receiver Operator Characteristic Curves for the Diagnostic Accuracy of Brain Biomarkers for Predicting Unfavorable outcome at 48 hours in patients that had an out-of-hospital cardiac arrest.

**eFigure 6.** Group Differences in Brain Biomarkers Between Patients That Had an Out-of-Hospital Cardiac Arrest with Favorable and Unfavorable Neurological Outcome.

**eFigure 7.** QUADAS-2 assessment for risk of bias and concerns of applicability

**eTable 1.** Study Characteristics.

**eTable 2.** Receiver Operator Characteristic Curve Analysis for the Diagnostic Accuracy of Brain Biomarkers for Predicting Unfavorable outcome at 48 hours in patients where outcome was determined  $\geq 3$  months following cardiac arrest.

**eTable 3.** Concentration Thresholds for Each Biomarker.

**eTable 4.** Studies Including Outcome Determination at Times Other Than Hospital Discharge and 6 Months.

**eTable 5.** Studies Including Survival vs Death as Outcome.

**eReferences.**

This supplementary material has been provided by the authors to give readers additional information about their work.

## **Appendix 1: Detailed Methods**

### *Literature Search*

We searched the following electronic databases from inception to September 15<sup>th</sup>, 2021.

MEDLINE, Embase, Evidence-Based Medicine Reviews, CINAHL, Cochrane Database and the WHO Global Health Library. We also searched the Cochrane Central Register of Controlled Trials, BioMed Central, ClinicalTrials.gov, WHO International Clinical Trials Registry Platform and Thomson Center Watch for unpublished works.

### *Search Terms*

We used two subsets of search terms. The first included studies that identified biomarkers of interest: “biomarker,” “neuron specific enolase,” “NSE,” “S100 beta,” “S100 calcium binding protein,” “glial fibrillary protein,” “GFAP,” “neurofilament-light,” “Nf-L,” “Tau,” “ubiquitin carboxyl hydrolase L1” and “UCH-L1.” The second included studies with the following terms: “cardiac arrest,” “post cardiac arrest,” “hypoxic ischemic brain injury,” “anoxic brain injury,” “ROSC,” and “return of spontaneous circulation.” The two search terms were combined using “AND” to identify relevant studies. See Appendix 2 for the MEDLINE search strategy.

### *Modification of inclusion criteria*

Upon review of the literature we felt it necessary to include additional time points for outcome determination that were not specified within the PROSPERO registration, which was restricted to hospital discharge and 6-months. This was due to the large amount of studies and thus patients wherein outcome determination was not made strictly at hospital discharge or at 6-

© 2022 American Medical Association. All rights reserved.

months but instead in between those time points. We have provided a table (eTable 4) outlining the specific studies that assessed outcomes at time points that differed from hospital discharge or 6-months. As noted in the final row of eTable 4, 36 studies (41% of all studies) and 5495 patients (52% of all patients) performed outcome determination at a time differing from hospital discharge and 6-months. Exclusion of these studies would have significantly limited this systematic review and meta-analysis by reducing the sample size by ~50%. Further, to increase generalizability and provide data to inform clinicians / patients, we included time points between discharge and 6-months to provide outcome time points that could enrich the findings by increasing the longitudinal timing of outcome determination. Similarly, we felt it appropriate to include studies that used survival versus death as their outcome as this comprised 9 studies (10% of all studies) and 741 patients (7% of all patients), which is outlined in eTable 5.

#### *Additional exclusion criteria*

We excluded studies that did not: 1) dichotomize neurological outcomes; 2) specify timing of bio-specimen collection or outcome determination; 3) report diagnostic test accuracy, biomarker concentration or did not report data compatible for extraction (e.g. figures that cannot be accurately digitized).

#### *Study Selection*

Using a two-stage selection process, two reviewers (RH and KR) independently screened abstracts using the inclusion and exclusion criteria. If the abstract was unavailable, the full text was reviewed instead. Following abstract screening, the reviewers independently reviewed each

identified full text before collaboratively making decisions on study inclusion. Disagreements regarding study inclusions were resolved by a third reviewer (MS).

#### *Data Extraction & Quality Assessment*

Four reviewers (RH, KR, ST and MS) used a pre-formatted spreadsheet (Microsoft Excel®, Redmond Washington, USA) to collect data on the study design, inclusion and exclusion criteria, brain biomarkers levels, diagnostic test accuracy, and neurological outcome. Study quality was assessed by two reviewers (RH and KR) using the QUADAS-2 scale. Studies were rated on their risk of bias and applicability in four domains: patient selection, index test, reference standard, and flow and timing.

## Appendix 2: Search strategy for MEDLINE

### *MEDLINE*

1. Biomarker.mp.
2. Neuron specific enolase.mp.
3. NSE.mp.
4. S100 beta.mp.
5. S100 calcium binding protein.mp.
6. Glial fibrillary protein.mp.
7. GFAP.mp.
8. Neurofilament-light.mp.
9. Nf-L.mp.
10. Tau.mp.
11. Ubiquitin Carboxyl Hydrolase L1.mp
12. UCH-L1.mp.
13. 1 or 2 or 3 or 4 or 5 or 6 or 7 or 8 or 9 or 10 or 11 or 12
14. Cardiac arrest.mp.
15. Post cardiac arrest.mp.
16. Hypoxic ischemic brain injury.mp.
17. Anoxic brain injury.mp.
18. ROSC.mp.
19. Return of spontaneous circulation.mp.
20. 14 or 15 or 16 or 17 or 18 or 19
21. 13 and 20

### **Appendix 3: Outline of data inclusion for studies with duplicated data.**

Data that were duplicated across more than one publication were not duplicated across our analysis, nor in our summary data in Table 1. However, publications with duplicated data that reported their data in a different fashion (ROC curves versus group summary statistics) or for different time points may have contributed to different aspects of this meta-analysis. Groups of publications with duplicated data are outlined below and the specific data from each is noted:

#### TTM studies:

Stammet *et al.*, 2015. *Journal of the American College of Cardiology*:

- NSE: Summary statistics (median±IQR) at 24hr, 48hr and 72hr
- NSE: ROC data at 24hr, 48hr, and 72hr

Mattsson *et al.*, 2017. *Annals of Neurology*:

- Tau: Summary statistics (median±IQR) at 24hr, 48hr and 72hr
- Tau: ROC data at 24hr, 48hr, and 72hr

Stammet *et al.*, 2017. *Critical Care*:

- S100B: Summary statistics (median±IQR) at 24hr, 48hr, and 72hr
- S100B: ROC data at 24hr, 48hr and 72hr

Moseby-Knappe *et al.*, 2019. *JAMA Neurology*:

- Nf-L: Summary statistics (median±IQR) at 24hr, 48hr and 72hr
- Nf-L: ROC data at 24hr, 48hr, and 72hr

Stefanizzi *et al.*, 2020. *International Journal of Molecular Sciences*:

© 2022 American Medical Association. All rights reserved.

- No data contributed to meta-analysis

Ebner *et al.*, 2020. *Resuscitation*:

- GFAP: Summary statistics (median $\pm$ IQR) at 24hr, 48hr, 72hr
- GFAP: ROC data at 24hr, 48hr and 72hr
- UCH-L1: Summary statistics (median $\pm$ IQR) at 24hr, 48hr, 72hr
- UCH-L1: ROC data at 24hr, 48hr and 72hr

Moseby-Knappe *et al.*, 2021. *Intensive Care Medicine*:

- No data contributed to meta-analysis

COMACARE studies:

Jakkula *et al.*, 2019. *Critical Care*:

- NSE: Summary statistics (median $\pm$ IQR) at 48hr

Wihersaari *et al.*, 2021. *Intensive Care Medicine*:

- Nf-L: Summary statistics (median $\pm$ IQR) at 24hr, 48hr and 72hr
- Nf-L: ROC data at 0hr, 24hr, 48hr, and 72hr

#### **Appendix 4: QUADAS-2 results**

It was determined that for patient selection 31% of studies had a low risk of bias, 54% had a high risk of bias, and the risk of bias was unclear in 15% of studies. Studies most commonly were assigned a high risk of bias because they did not avoid inappropriate patient exclusion. For the index test (biomarkers), it was unclear (i.e. not specified) in 54% of studies if results were interpreted without the knowledge of the reference standard (clinical outcomes), while it was unclear (i.e. not specified) in 51% of studies if results of the reference standard were interpreted without the knowledge of the index test. Risk of bias was determined to be low for 43% of studies regarding the index test category and for 44% of studies regarding the reference standard category. Risk of bias related to flow and timing was high for 44% of studies, where the interval between the index test (biomarkers) and reference standard (neurological outcome) was determined as not appropriate in 40% of studies. Overall, the concerns of applicability were low in 92% of studies for patient selection, 92% of studies for the index test, and 94% of studies for the reference standard (See eFigure 7).



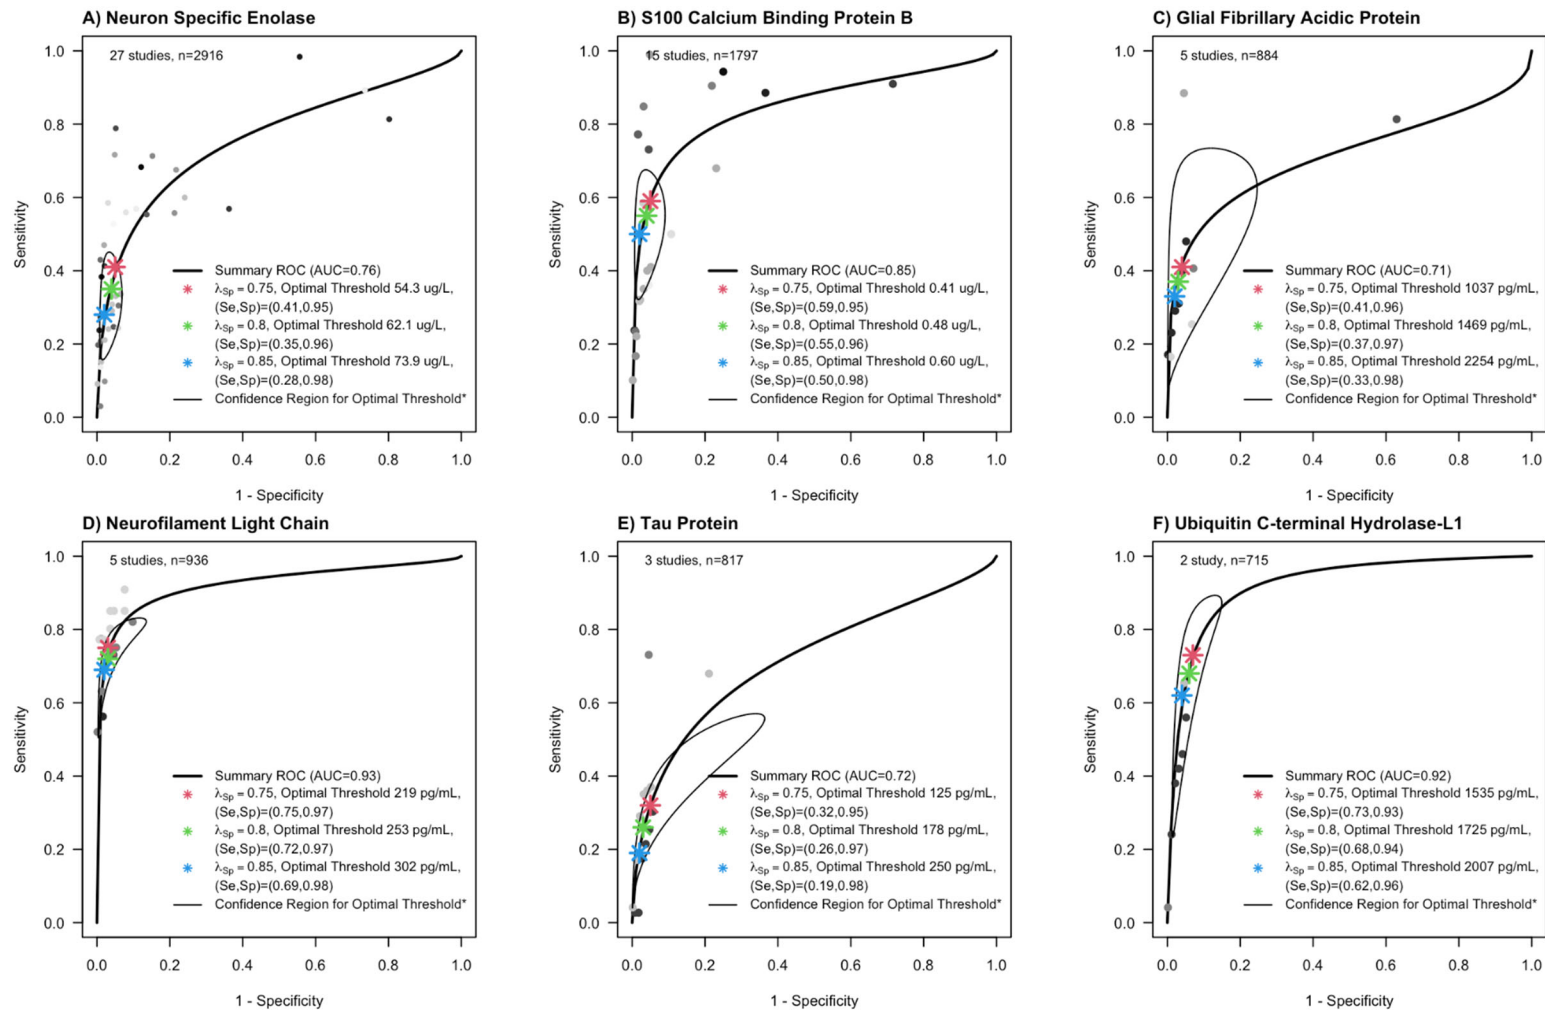

**eFigure 1. Receiver Operator Characteristic Curves for the Diagnostic Accuracy of Brain Biomarkers Post ROSC for Predicting Unfavorable Outcome at 24 hours.** Summary receiver operator characteristic (SROC) curves and their confidence intervals for each biomarker at 24 hours post return of spontaneous circulation (ROSC) are presented. Each individual black/grey dot represents a unique study. We estimated optimal thresholds for each biomarker for particular weights of specificity. We weighted specificity at 75% (red symbols), 80% (green symbols), and 85% (blue symbols) with sensitivity weighted 25%, 20%, and 15% respectively. For each weight of specificity an optimal threshold on the SROC curve was determined and is reported in the figure for each variable. The

SROC AUC and 95% confidence intervals for each biomarker are: NSE- 0.76 (0.66-0.84); S100b- 0.85 (0.77-0.91); GFAP- 0.71 (0.42-0.90); NFL- 0.93 (0.87-0.95); Tau- 0.72 (0.46-0.90); UCH-L1- 0.92 (0.69-0.97).

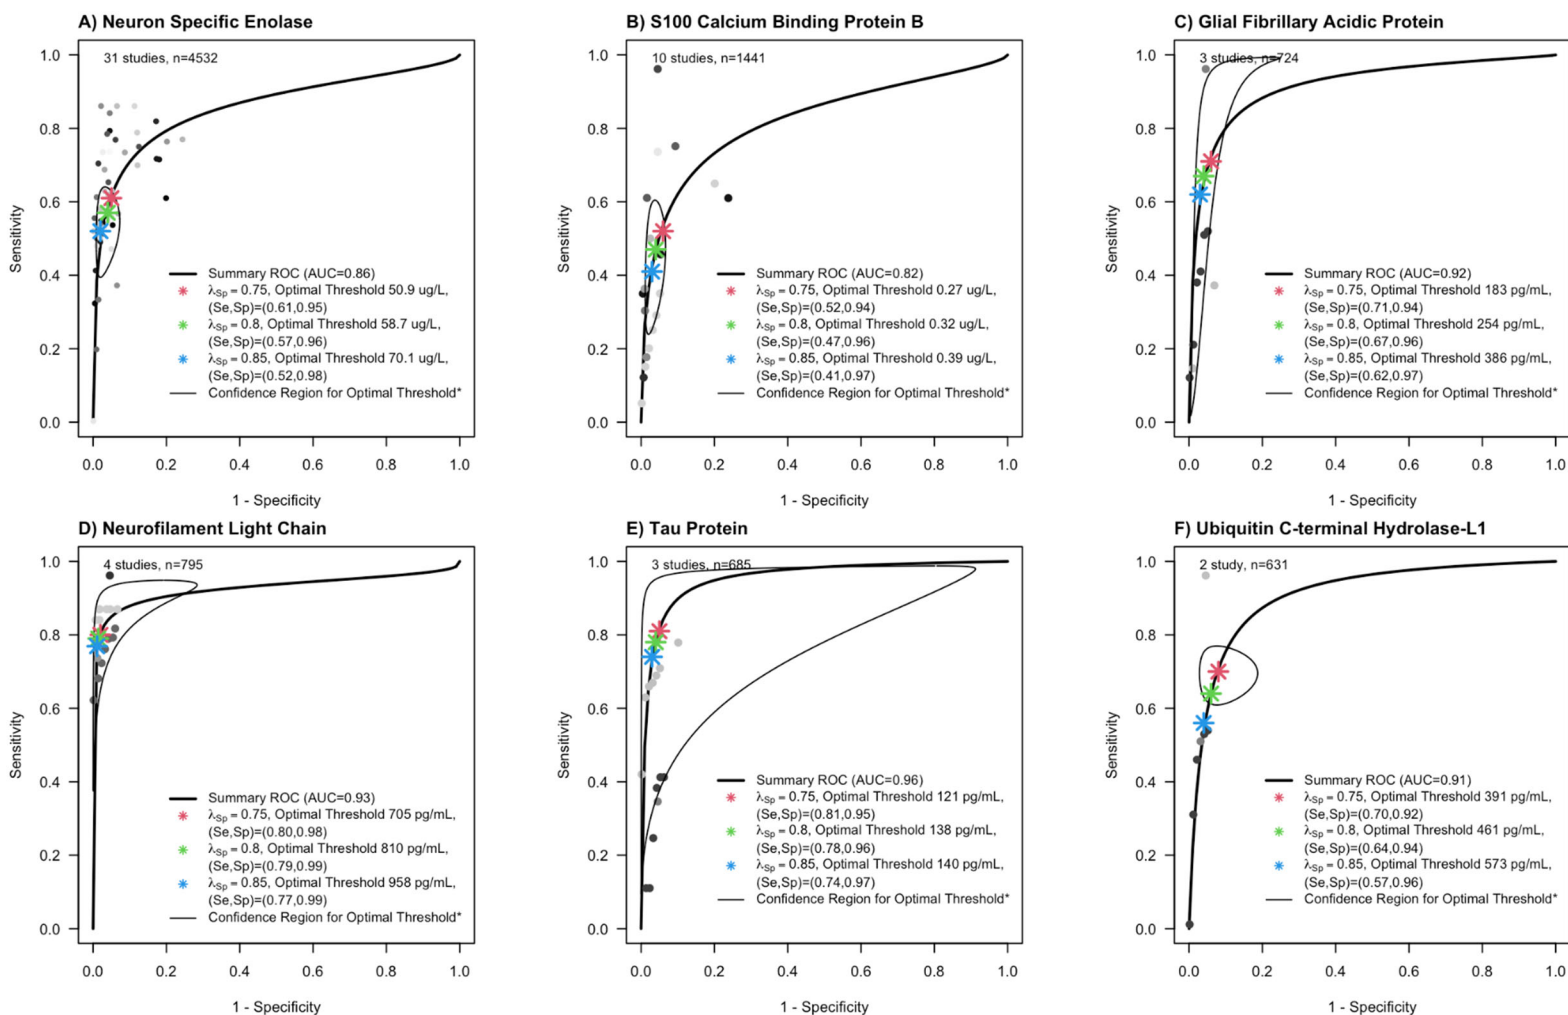

**eFigure 2. Receiver Operator Characteristic Curves for the Diagnostic Accuracy of Brain Biomarkers Post ROSC for Predicting Unfavorable Outcome at 72 hours.** Summary receiver operator characteristic (SROC) curves and their confidence intervals for each biomarker at 72 hours post return of spontaneous circulation (ROSC) are presented. Each individual black/grey dot represents a unique study. We estimated optimal thresholds for each biomarker for particular weights of specificity. We weighted specificity at 75% (red symbols), 80% (green symbols), and 85% (blue symbols) with sensitivity weighted 25%, 20%, and 15% respectively. For each weight of specificity an optimal threshold on the SROC curve was determined and is reported in the figure for each variable. The

© 2022 American Medical Association. All rights reserved.

SROC AUC and 95% confidence intervals for each biomarker are: NSE- 0.86 (0.80-0.90); S100b- 0.82 (0.72-0.90); GFAP- 0.92 (0.40-0.99); NFL- 0.93 (0.87-0.96); Tau- 0.96 (0.22-0.99); UCH-L1- 0.91 (0.81-0.93).

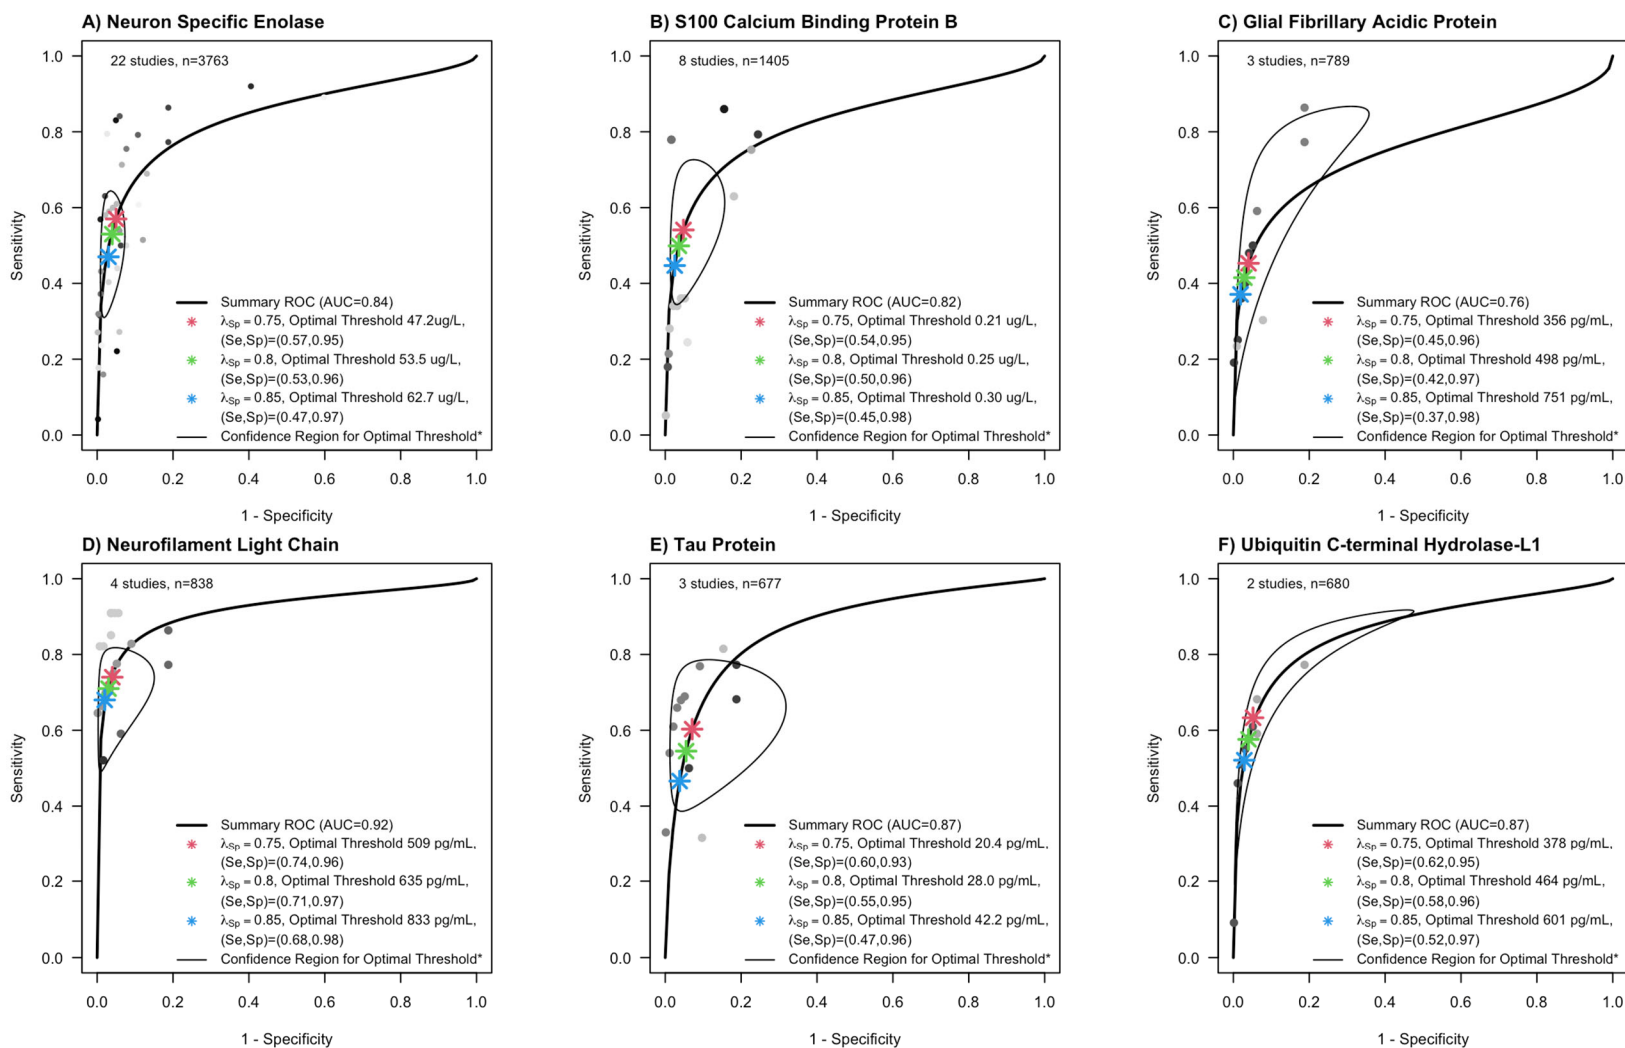

**eFigure 3. Receiver Operator Characteristic Curves for the Diagnostic Accuracy of Brain Biomarkers for Predicting Unfavorable outcome at 48 hours in patients that underwent targeted temperature management.** Summary receiver operator characteristic (SROC) curves and their confidence intervals for each biomarker are presented. Each individual black/grey dot represents a unique study. We estimated optimal thresholds for each biomarker for particular weights of specificity. We weighted specificity at 75% (red symbols), 80% (green symbols), and 85% (blue symbols) with sensitivity weighted 25%, 20%, and 15%

© 2022 American Medical Association. All rights reserved.

respectively. For each weight of specificity an optimal threshold on the SROC curve was determined and is reported in the figure for each variable. The SROC AUC and 95% confidence intervals for each biomarker are: NSE- 0.84 (0.77-0.90); S100b- 0.82 (0.72-0.90); GFAP- 0.76 (0.42-0.93); NFL- 0.92 (0.86-0.95); Tau- 0.87 (0.80-0.92); UCH-L1- 0.87 (0.41-0.97).

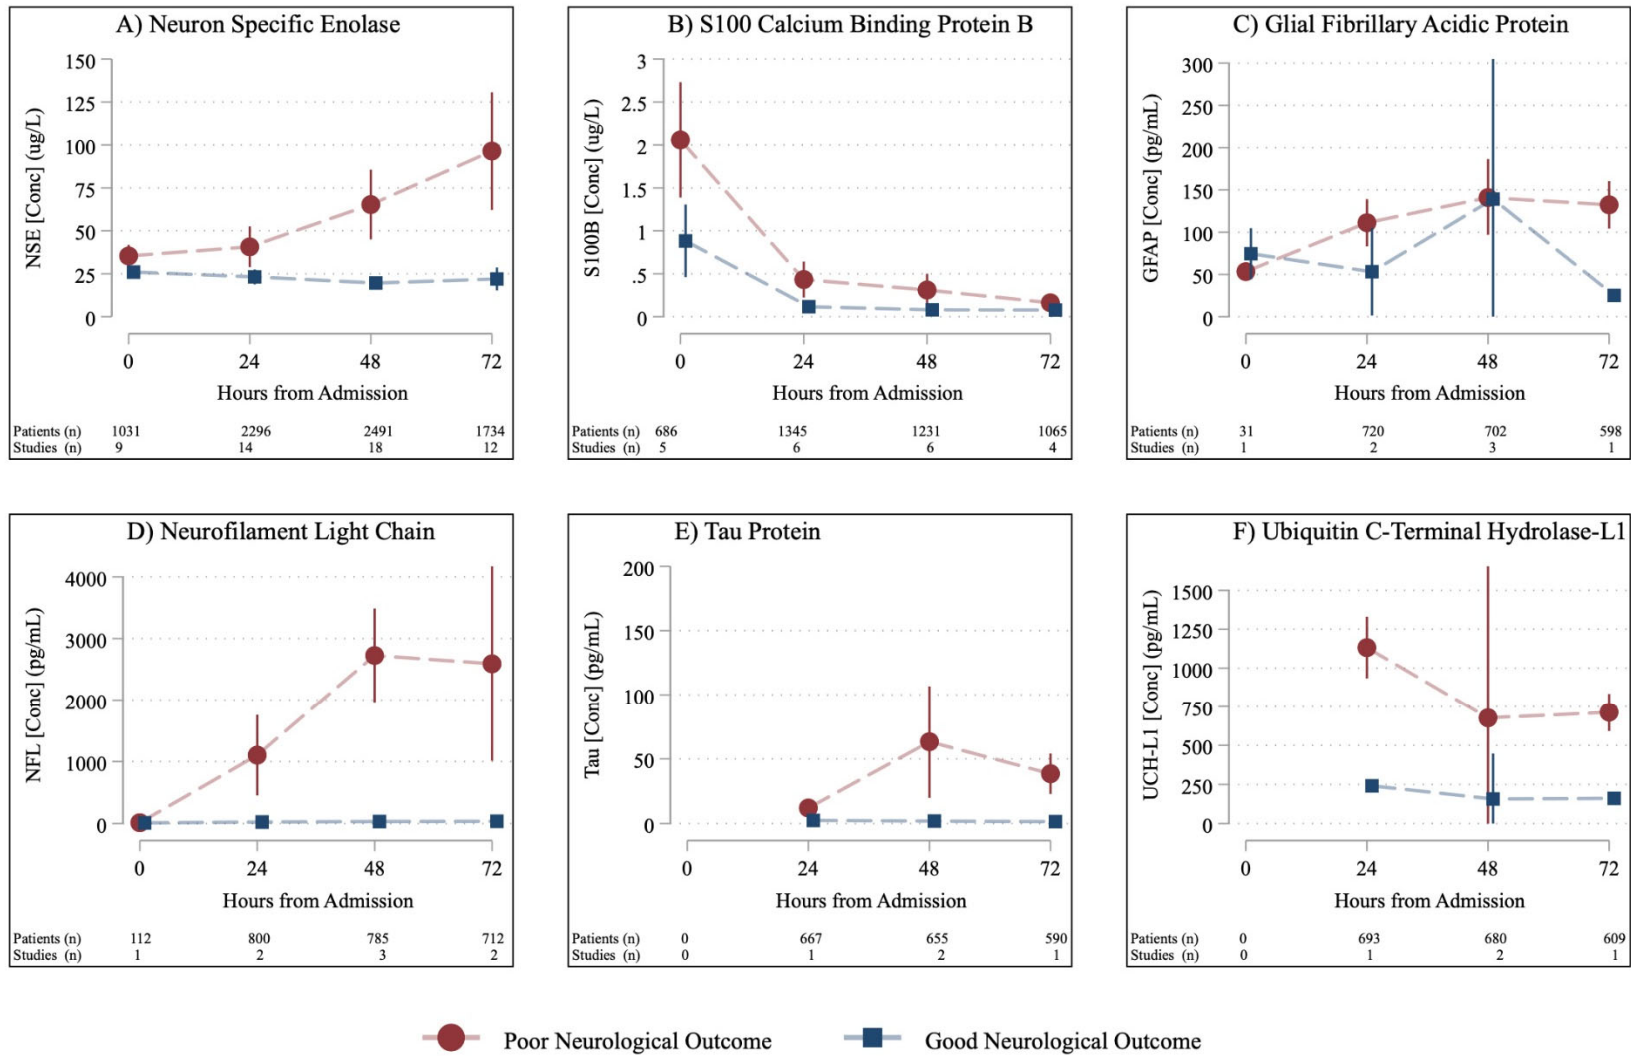

**eFigure 4. Group Differences in Brain Biomarkers Between Patients That Underwent TTM with Favorable and Unfavorable Neurological Outcome.** The median concentration and spread (interquartile range) are reported in patients with favorable (blue squares) and unfavorable (red circles) outcome at 0, 24,

48, and 72 hours following admission. The number of patients and studies included in the determination of the median and interquartile range for each time point is noted within each graph.



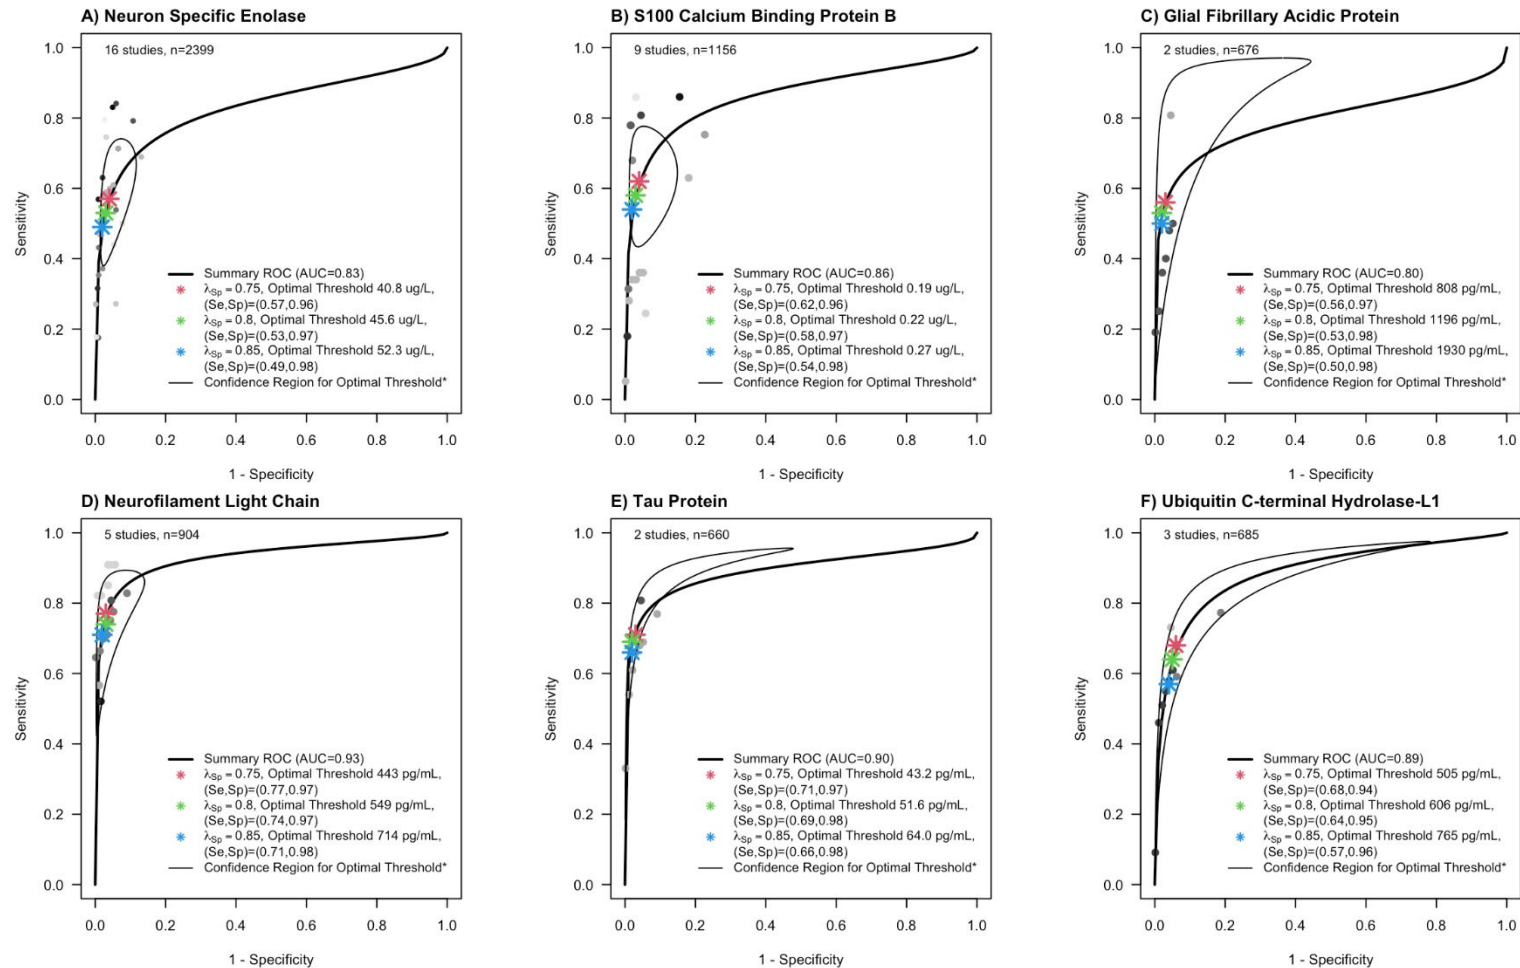

**eFigure 5. Receiver Operator Characteristic Curves for the Diagnostic Accuracy of Brain Biomarkers for Predicting Unfavorable outcome at 48 hours in patients that had an out-of-hospital cardiac arrest.** Summary receiver operator characteristic (SROC) curves and their confidence intervals for each biomarker are presented. Each individual black/grey dot represents a unique study. We estimated optimal thresholds for each biomarker for particular weights of specificity. We weighted specificity at 75% (red symbols), 80% (green symbols), and 85% (blue symbols) with sensitivity weighted 25%, 20%, and 15% respectively. For each weight of specificity an optimal threshold on the SROC curve was determined and is reported in the figure for each variable. The SROC AUC and 95%

© 2022 American Medical Association. All rights reserved.

confidence intervals for each biomarker are: NSE- 0.83 (0.77-0.89); S100b- 0.86 (0.79-0.92); GFAP- 0.80 (0.59-0.92); NFL- 0.93 (0.86-0.97); Tau- 0.90 (0.74-0.97); UCH-L1- 0.89 (0.53-0.99).

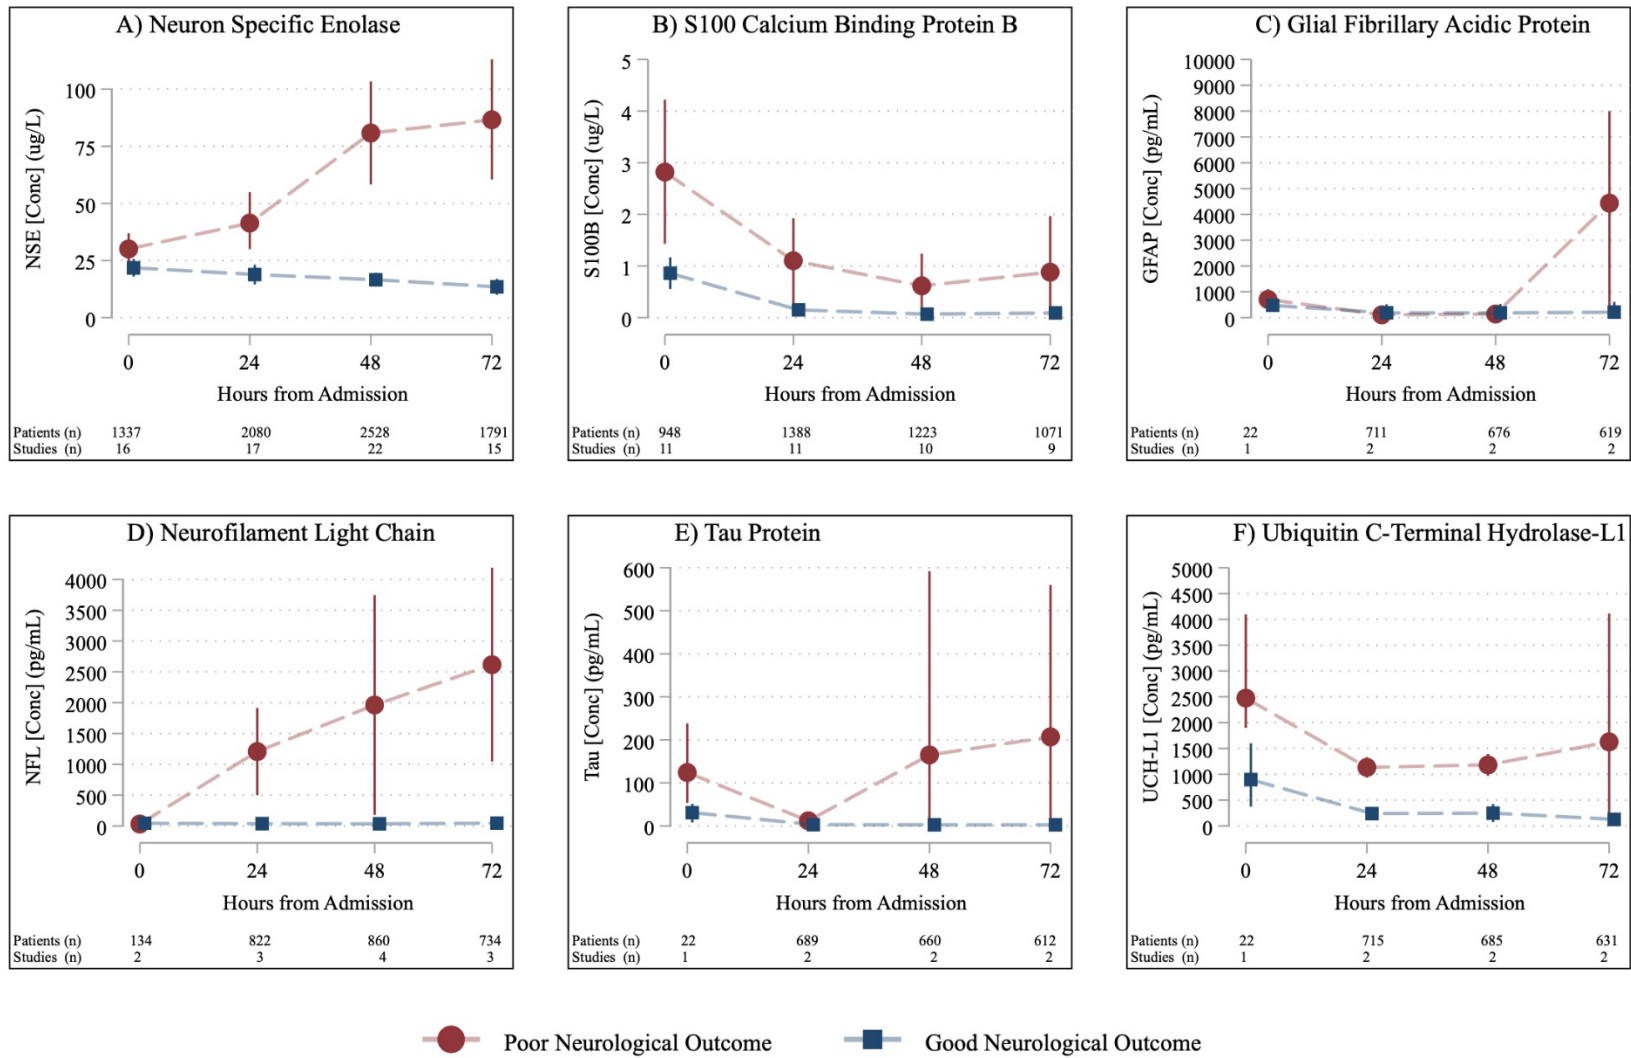

**eFigure 6. Group Differences in Brain Biomarkers Between Patients That Had an Out-of-Hospital Cardiac Arrest with Favorable and Unfavorable Neurological Outcome.** The median concentration and spread (interquartile range) are reported in patients with favorable (blue squares) and unfavorable (red

circles) outcome at 0, 24, 48, and 72 hours following admission. The number of patients and studies included in the determination of the median and interquartile range for each time point is noted within each graph.

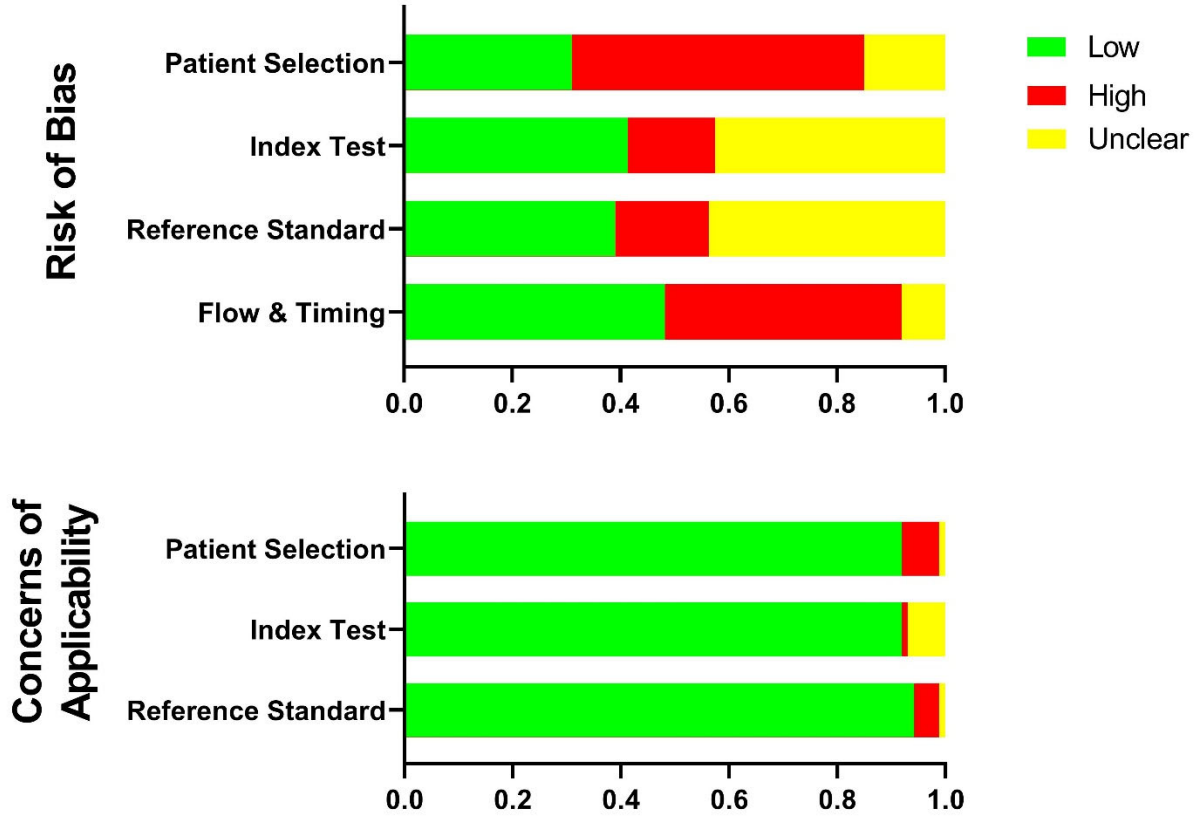

eFigure 7. QUADAS-2 assessment for risk of bias and concerns of applicability.

**eTable 1.** Study Characteristics.

| Study                                                     | Study Design  | Inclusion Criteria                                                                                                                                                                    | Exclusion Criteria                                                                                   | Biomarkers assessed | Neurologic Scale    | Time of outcome determination                                                                           | Number of patients |
|-----------------------------------------------------------|---------------|---------------------------------------------------------------------------------------------------------------------------------------------------------------------------------------|------------------------------------------------------------------------------------------------------|---------------------|---------------------|---------------------------------------------------------------------------------------------------------|--------------------|
| Adler et al. 2021 <sup>1</sup><br>PMID:<br>34328545       | Retrospective | Non-traumatic OHCA                                                                                                                                                                    | Not specified                                                                                        | NSE, Nf-L           | CPC 1&2 vs. CPC 3-5 | Hospital discharge                                                                                      | 53                 |
| Akin et al. 2021 <sup>2</sup><br>PMID:<br>33411836        | Retrospective | OHCA patients                                                                                                                                                                         | Death before 3-days of ICU stay                                                                      | NSE, S100B          | CPC 1&2 vs. CPC 3-5 | Day of discharge from either inpatient medical treatment or intensive care neurological rehabilitation, | 251                |
| Auer et al. 2006 <sup>3</sup><br>PMID:<br>17175624        | Prospective   | ROSC after CPR of at least 5 min; non-traumatic normothermic IHCA or OHCA.                                                                                                            | History of cancer before CPR; transfer from other ICUs; non-cardiac etiology for the cardiac arrest. | NSE                 | Survival            | Survival to hospital discharge or death                                                                 | 17                 |
| Barbella et al. 2020 <sup>4</sup><br>PMID:<br>32044334    | Retrospective | Adults admitted for cardiac arrest                                                                                                                                                    | Not specified                                                                                        | NSE                 | CPC 1-3 vs. 4&5     | 3 months post CA                                                                                        | 158                |
| Bongiovanni et al. 2020 <sup>5</sup><br>PMID:<br>32016534 | Prospective   | All comatose adult patients resuscitated from CA for whom data were available for N20 response on SSEP, complete pupillary and corneal reflexes evaluation, EEG and NSE determination | Brain death within 24h                                                                               | NSE                 | CPC 1&2 vs. 3-5     | 3 months after CA                                                                                       | 485                |

<sup>1</sup>Adler et al., (2021). *J Neurol*. doi: 10.1007/s00415-021-10722-3<sup>2</sup>Akin et al., (2021). *PLoS One*. 16(1):e0245210<sup>3</sup>Auer et al., (2006). *CJEM*. 8(1):13-8.<sup>4</sup>Barbella et al., (2020). *Resuscitation*. 149:17-23<sup>5</sup>Bongiovanni et al., (2020). *Intensive Care Med*. 46(5):963-972

|                                                               |             |                                                                                                                                                                                            |                                                                                                                                                                                                                                                                                              |            |                     |                      |     |
|---------------------------------------------------------------|-------------|--------------------------------------------------------------------------------------------------------------------------------------------------------------------------------------------|----------------------------------------------------------------------------------------------------------------------------------------------------------------------------------------------------------------------------------------------------------------------------------------------|------------|---------------------|----------------------|-----|
| Bottiger et al. 2001 <sup>6</sup><br>PMID:<br>11390339        | Prospective | Patients who had undergone CPR after nontraumatic cardiac arrest before admission to the hospital and who were covered by the local physician-staffed advanced cardiac life support system | Not specified                                                                                                                                                                                                                                                                                | NSE, S100B | CPC 1 vs. CPC 4&5   | 14 days post ROSC    | 66  |
| Choi et al. 2016 <sup>7</sup><br>PMID:<br>27287003            | Prospective | All cardiac arrest patients with sustained unconsciousness, regardless of location of arrest or initial rhythm,                                                                            | Age < 18 years old, traumatic arrest, marked signs of infection                                                                                                                                                                                                                              | NSE, S100B | CPC 1&2 vs. CPC 3-5 | Hospital discharge   | 119 |
| Chung-Esaki et al. 2018 <sup>8</sup><br>PMID:<br>30145080     | Prospective | Adult patients ≥18 years who were resuscitated from cardiac arrest and had persistent coma after return of spontaneous circulation.                                                        | Patients with pre-existing DNR orders, pregnancy, terminal or severe coexisting systemic disease limiting life expectancy, active enrollment in experimental drug therapies/procedures which would interfere with the study or lack of surrogate decision maker to provide informed consent. | NSE        | GOS 3-5 vs. 1-2     | 6 months post arrest | 98  |
| Clifford-Mobley et al. 2020 <sup>9</sup><br>PMID:<br>31615270 | Prospective | Post-OHCA patients who had serum NSE measured on admission                                                                                                                                 | Death within the first 72h and no subsequent NSE concentration available                                                                                                                                                                                                                     | NSE        | Survival            | ICU discharge        | 142 |

<sup>6</sup>Bottiger *et al.*, (2001). *Circulation*. 103(22):2694-8.

<sup>7</sup>Choi *et al.*, (2016). *Emerg Med J*. 33(10):690-5

<sup>8</sup>Chung-Esaki *et al.*, (2018). *J Clin Neurosci*. 57:99-104.

<sup>9</sup>Clifford Mobley *et al.* (2020). *Ann Clin Biochem*. 57(1):69-76

|                                                        |             |                                                                                                                                                                                    |                                                                                                                                                                      |            |                 |                                             |     |
|--------------------------------------------------------|-------------|------------------------------------------------------------------------------------------------------------------------------------------------------------------------------------|----------------------------------------------------------------------------------------------------------------------------------------------------------------------|------------|-----------------|---------------------------------------------|-----|
| Daubin et al. 2011 <sup>10</sup><br>PMID:<br>21824428  | Prospective | Patients who remained in coma at 48 hours after cardiac arrest were included in the analysis                                                                                       | Patients who died or awoke within the first 48 hours of admission were excluded                                                                                      | NSE        | CPC 1-3 vs. 4&5 | 3 months post CA                            | 97  |
| Derwall et al. 2009 <sup>11</sup><br>PMID:<br>19368739 | Prospective | Adults >18 years old suffering from non traumatic out of hospital CA                                                                                                               | Sepsis, stroke, previous CPR and cancer in last 6 months                                                                                                             | S100B      | CPC 1&2 vs. 3-5 | 14 days post ROSC                           | 68  |
| Deye et al. 2020 <sup>12</sup><br>PMID:<br>32858156    | Prospective | All comatose adult patients $\geq$ 18 years old who suffered from non-traumatic and successfully resuscitated CA with sustained ROSC (>20min), hospitalized in ICU and TTM-treated | Conscious patients, without sustained ROSC, refractory CA or cardiogenic shock after CA necessitating ECLS, DNR order and patients without any S100B values measured | NSE, S100B | CPC 1&2 vs. 3-5 | At hospital discharge and 3 months after CA | 330 |
| Disanto et al. 2019 <sup>13</sup><br>PMID:<br>31375414 | Prospective | Patients with post-anoxic encephalopathy due to CA who were consecutively admitted to the ICU of Ticino Cardiocentre.                                                              | Not specified                                                                                                                                                        | NSE, NF-L  | Survival        | 1 month after CA                            | 14  |

<sup>10</sup>Daubin et al., (2011). *BMC Cardiovasc Discord.* 11:48.

<sup>11</sup>Derwall et al., (2009). *Crit Care.* 13(2):R58.

<sup>12</sup>Deye et al., (2020). *Resuscitation.* 156:251-259.

<sup>13</sup>Disanto et al., (2019). *Epilepsy Behav.* 101(Pt B):106432



|                                                          |                      |                                                                                                                                                                                                                                                                 |                                                                                                                                                                                                                                                                                                                                                                                                                                                                                                                                      |                     |                            |                                |            |
|----------------------------------------------------------|----------------------|-----------------------------------------------------------------------------------------------------------------------------------------------------------------------------------------------------------------------------------------------------------------|--------------------------------------------------------------------------------------------------------------------------------------------------------------------------------------------------------------------------------------------------------------------------------------------------------------------------------------------------------------------------------------------------------------------------------------------------------------------------------------------------------------------------------------|---------------------|----------------------------|--------------------------------|------------|
| <p>Duez et al. 2018<sup>14</sup><br/>PMID: 29175384</p>  | <p>Retrospective</p> | <p>OHCA with a presumed cardiac origin, Glasgow Coma Scale below 8, sustained spontaneous circulation after resuscitation (no need for cardiac compressions for 20 min and clinical signs of circulation), aged between 18 and 80 years</p>                     | <p>Time to ROSC &gt; 60 min, terminal disease, severe coagulopathy, unwitnessed OHCA with asystole as first rhythm, time from cardiac arrest to the initiation of cooling &gt; 240 min, pregnancy, previous neurological disease with cognitive impairment, persistent cardiogenic shock, systolic blood pressure below 80 mmHg despite vasoactive treatment and/or aortic balloon pump intervention, suspected or confirmed acute intracerebral bleeding/acute stroke, acute coronary artery bypass surgery, or lack of consent</p> | <p>NSE, S100B</p>   | <p>CPC 1&amp;2 vs. 3-5</p> | <p>6 months post discharge</p> | <p>115</p> |
| <p>Ebner et al. 2020<sup>15</sup><br/>PMID: 32445783</p> | <p>Prospective</p>   | <p>Patients 18 years or older who were unconscious (GCS &lt;8) on admission to hospital after out-of-hospital cardiac arrest of presumed cardiac cause, irrespective of the initial rhythm. Eligible patients had more than 20 consecutive minutes of ROSC.</p> | <p>Not Specified</p>                                                                                                                                                                                                                                                                                                                                                                                                                                                                                                                 | <p>GFAP, UCH-L1</p> | <p>CPC 1&amp;2 vs. 3-5</p> | <p>6 months post arrest</p>    | <p>717</p> |

<sup>14</sup>Duez et al., (2018). *Resuscitation*. 122:79-86.

<sup>15</sup>Ebner et al., (2020). *Resuscitation*. 154:61-68.

|                                                        |               |                                                                                                                                  |                                                                                                                                                                                                                          |                  |                 |                          |     |
|--------------------------------------------------------|---------------|----------------------------------------------------------------------------------------------------------------------------------|--------------------------------------------------------------------------------------------------------------------------------------------------------------------------------------------------------------------------|------------------|-----------------|--------------------------|-----|
| Einav et al. 2012 <sup>16</sup><br>PMID:<br>22813607   | Prospective   | All patients with non-traumatic OHCA, age 18 years, who were brought after ROSC to the Shaare Zedek Medical Center               | Arrest triggered by acute hemorrhage, hanging or drowning                                                                                                                                                                | NSE, S100B       | CPC 1&2 vs. 3-5 | Within 24hr of discharge | 195 |
| Einav et al. 2013 <sup>17</sup><br>PMID:<br>23391666   | Prospective   | All patients aged ≥18 years who had undergone non-traumatic OHCA and resuscitation and were brought to the SZMC after ROSC       | Patients who had arrested due to acute hemorrhage or external causes were excluded.                                                                                                                                      | NSE, S100B       | Survival        | Hospital discharge       | 158 |
| Elmer et al. 2016 <sup>18</sup><br>PMID:<br>26457752   | Prospective   | In-hospital and out-of-hospital cardiac arrest; having received chest compressions or defibrillation; ED arrests considered OHCA | Younger than 18; presented greater than 6 hours after ROSC; had withdrawal of life-sustaining therapy within 6 hours of presentation, pregnant, prisoner, or they arrested secondary to a surgical or traumatic etiology | NSE, S100B       | Survival        | Hospital Discharge       | 86  |
| Gillick et al. 2018 <sup>19</sup><br>PMID:<br>29679695 | Retrospective | Patients with OHCA admitted to the Intensive care unit                                                                           | Not specified                                                                                                                                                                                                            | NSE              | CPC 1&2 vs. 3-5 | At hospital discharge    | 72  |
| Gulay et al. 2016 <sup>20</sup><br>PMID:<br>27966313   | Prospective   | Not Specified                                                                                                                    | Age under 18, head trauma, trauma related arrest, status epilepticus, and patients who died in first 24 hours                                                                                                            | NSE, S100B, GFAP | GOS 3-5 vs. 1&2 | Discharge                | 30  |

<sup>16</sup>Einav et al., (2012). *J Am Coll Cardiol.* 60(4):304-11.

<sup>17</sup>Einav et al., (2013). *Resuscitation.* 84(8):1083-8

<sup>18</sup>Elmer et al., (2016). *Crit Care Med.* 44(1):111-9.

<sup>19</sup>Gillick et al., (2018). *Resuscitation.* 128:24-30.

<sup>20</sup>Gulay et al., (2016). *Turk J Med Sci.* 46(5):1459-1468.

|                                                           |               |                                                                                                                                                          |                                                                                                                                                                    |      |                 |                                            |     |
|-----------------------------------------------------------|---------------|----------------------------------------------------------------------------------------------------------------------------------------------------------|--------------------------------------------------------------------------------------------------------------------------------------------------------------------|------|-----------------|--------------------------------------------|-----|
| Hasper et al. 2009 <sup>21</sup><br>PMID:<br>19874577     | Retrospective | Not Specified                                                                                                                                            | Death before 3rd day of study, incomplete data records, pre-existing need for renal replacement therapy, pre-existing advanced renal disease                       | NSE  | CPC 1&2 vs. 3-5 | ICU Discharge                              | 171 |
| Hasslacher et al. 2014 <sup>22</sup><br>PMID:<br>25138227 | Prospective   | All consecutive adult patients (at least 18 years) admitted to the medical ICU after successful CPR.                                                     | Presence of neuroendocrine tumour, stroke, intracranial hemorrhage or trauma as a cause of CA or life expectancy of <24h as determined by the treating physicians. | NSE  | CPC 1&2 vs. 3-5 | At hospital discharge                      | 134 |
| Hasslacher et al. 2020 <sup>23</sup><br>PMID:<br>32004662 | Prospective   | Adult patients aged ≥18 years with an in-hospital or out-of-hospital cardiac arrest with presumed cardiac cause admitted to the ICU after successful CPR | Presence of neuroendocrine tumour, stroke, intracranial hemorrhage or trauma as a cause of CA or life expectancy of <24h as determined by the treating physicians. | Tau  | CPC 1&2 vs. 3-5 | Discharge from hospital or at death in ICU | 132 |
| Hayashida et al. 2010 <sup>24</sup><br>PMID:<br>20033352  | Retrospective | Out of hospital cardiac arrest patients admitted to the emergency medical center                                                                         | Patients with a history of trauma, extracorporeal CPR, severe stroke on initial head CT, withdrawal due to terminal disease or persistent untreatable hypotension  | GFAP | CPC 1&2 vs. 3-5 | 6 months after ROSC                        | 21  |

<sup>21</sup>Hasper et al., (2009). *Crit Care*. 13(5):R168.

<sup>22</sup>Hasslacher et al., (2014). *Intensive Care Med*. 40(10):1518-27.

<sup>23</sup>Hasslacher et al., (2020). *Resuscitation*. 148:207-214.

<sup>24</sup>Hayashida et al., (2010). *Neurocrit Care*. 12(2):252-7.

|                                                           |             |                                                                                                                                                                                                                                                                                                                                                                                                                                                                          |                                                                                                                                                                                                                                                                                                                                                                                                                                                                                                      |                              |                  |                      |     |
|-----------------------------------------------------------|-------------|--------------------------------------------------------------------------------------------------------------------------------------------------------------------------------------------------------------------------------------------------------------------------------------------------------------------------------------------------------------------------------------------------------------------------------------------------------------------------|------------------------------------------------------------------------------------------------------------------------------------------------------------------------------------------------------------------------------------------------------------------------------------------------------------------------------------------------------------------------------------------------------------------------------------------------------------------------------------------------------|------------------------------|------------------|----------------------|-----|
| Helwig et al.<br>2017 <sup>25</sup><br>PMID:<br>28054291  | Prospective | A documented successful out of hospital or in-hospital CPR within the last 60 h                                                                                                                                                                                                                                                                                                                                                                                          | (1) age under 18 years, (2) previous stroke within the last 12 months, (3) traumatic brain injury within the last 12 months, (4) any brain tumor in medical history                                                                                                                                                                                                                                                                                                                                  | NSE, GFAP                    | mGOS 0-3 vs. 4&5 | 4 weeks after CPR    | 100 |
| Hoiland et al.<br>2021 <sup>26</sup><br>PMID:<br>34287000 | Prospective | Eligible patients met the following inclusion criteria: a) age $\geq 19$ ; b) sustained cardiac arrest > 10 minutes requiring cardiopulmonary resuscitation; c) post-return of spontaneous circulation (ROSC) Glasgow Coma Score $\leq 8$ and motor score $\leq 5$ in the absence of clinical confounders (sedative medications, core body temperature < 35°C, electrolyte disturbances, hypoglycemia); d) study enrollment with 72 hours of the initial cardiac arrest. | Patients were excluded if they met any of the following: a) anticipated withdrawal of life-sustaining therapies within the next 24 hours; b) previous or current traumatic brain injury, intracranial hemorrhage or stroke; c) concurrent coagulopathy (international normalized ratio > 1.5, prothrombin time > 40 seconds, platelet count < 100 x 10 <sup>9</sup> cells); d) concurrent anti-platelet or anticoagulant medications; e) anticipated cardiac catheterization within the next 7 days. | NSE, GFAP, Nf-L, Tau, UCH-L1 | CPC 1&2 vs. 3-5  | 6 months post arrest | 18  |

<sup>25</sup>Helwig et al., (2017). *Neurocrit Care*. 27(1):68-74.

<sup>26</sup>Hoiland et al., (2021). *Circ Res*. 129(5):583-597.

|                                                            |               |                                                                                                                                                               |                                                                                                                                                                                                                                                                                                                                                           |                                  |                     |                      |     |
|------------------------------------------------------------|---------------|---------------------------------------------------------------------------------------------------------------------------------------------------------------|-----------------------------------------------------------------------------------------------------------------------------------------------------------------------------------------------------------------------------------------------------------------------------------------------------------------------------------------------------------|----------------------------------|---------------------|----------------------|-----|
| Huang et al.<br>2016 <sup>27</sup><br>PMID:<br>27256246    | Prospective   | Eligible patients included adult (> 18 years old) non-traumatic OHCA patients who were successfully resuscitated with sustained ROSC for more than 20 minutes | Patients were excluded if they were transferred to other hospitals for post-cardiac arrest care, or if their relatives or surrogates refused to participate in the study. Patients with do not attempt resuscitation orders and those expecting to survive for less than 180 days due to underlying diseases before the cardiac arrest also were excluded | S100B                            | Survival            | Hospital discharge   | 99  |
| Huesgen et al.<br>2021 <sup>28</sup><br>PMID:<br>34223394  | Prospective   | Non-traumatic OHCA patients                                                                                                                                   | Patients were excluded if pregnant, incarcerated, or had advanced directives precluding resuscitation. Other exclusion criteria were the presence of another neurologic disease, brain injury, brain cancer, end-stage renal disease, and end-stage liver disease.                                                                                        | GFAP, Nf-L, UCH-L1, Tau, & S100B | CPC 1&2 vs. CPC 3-5 | 6 months post arrest | 22  |
| Hunziker et al.<br>2021 <sup>29</sup><br>PMID:<br>33472689 | Prospective   | OHCA patients                                                                                                                                                 | None                                                                                                                                                                                                                                                                                                                                                      | NSE & Nf-L                       | CPC 1&2 vs. CPC 3-5 | Hospital discharge   | 164 |
| Jakkula et al.<br>2019 <sup>30</sup><br>PMID:<br>31088512  | Retrospective | Not Specified                                                                                                                                                 | Not Specified                                                                                                                                                                                                                                                                                                                                             | NSE                              | CPC 1&2 vs. 3-5     | 6 months post arrest | 118 |

<sup>27</sup>Huang et al., (2016). *Sci Rep.* 6:27187.

<sup>28</sup>Huesgen et al., (2021). *Resusc Plus.* 7:100133.

<sup>29</sup>Hunziker et al., (2021). *Crit Care.* 25(1):32.

<sup>30</sup>Jakkula et al., (2019). *Crit Care.* 23(1):171.

|                                                          |             |                                                                                                                                                                                              |                                                                                                                                                                                                                                                                                                                                                                                                                            |            |                     |                     |    |
|----------------------------------------------------------|-------------|----------------------------------------------------------------------------------------------------------------------------------------------------------------------------------------------|----------------------------------------------------------------------------------------------------------------------------------------------------------------------------------------------------------------------------------------------------------------------------------------------------------------------------------------------------------------------------------------------------------------------------|------------|---------------------|---------------------|----|
| Jang et al.<br>2019 <sup>31</sup><br>PMID:<br>30732223   | Prospective | Adult patients (aged >18 years) who were successfully resuscitated and achieved ROSC after non-traumatic out of hospital CA (OHCA) and then received TTM at 33°C were enrolled in this study | Patients with possible causes of coma other than CA (head injury, poisoning, or cerebrovascular accident) and those with severe neurological disorder or stroke, end-stage non-cardiac disease, severe disability (Glasgow-Pittsburgh cerebral performance category, CPC ≥3), or end-stage renal or liver disease were excluded. In addition, patients who died within 24hours after hospital admission were not included. | S100B      | CPC 1&2 vs. 3-5     | 3 months post CA    | 97 |
| Kaneko et al.<br>2017 <sup>32</sup><br>PMID:<br>28482803 | Prospective | Not Specified                                                                                                                                                                                | Trauma, non-cardiogenic disorder                                                                                                                                                                                                                                                                                                                                                                                           | NSE, S100B | CPC 1&2 vs. 3-5     | Hospital discharge  | 43 |
| Kang et al.<br>2021 <sup>33</sup><br>PMID:<br>33917473   | Prospective | Adult comatose OHCA patients treated with TT<.                                                                                                                                               | Next of kin declined treatment following cardiac arrest, <18 years of age, if the cardiac arrest was cause due to trauma, failure to maintain TTM, ineligibility for lumbar puncture                                                                                                                                                                                                                                       | NSE, S100B | CPC 1&2 vs. CPC 3-5 | 3 months after ROSC | 45 |

<sup>31</sup>Jang et al., (2019). *Medicine (Baltimore)*. 98(6):e14496.

<sup>32</sup>Kaneko et al., (2017). *BMC Cardiovasc Disord*. 17(1):111.

<sup>33</sup>Kang et al., (2021). *J Clin Med*. 10(7):1531.

|                                                        |               |                                                                                                                                                                                             |                                                                                                                                                      |                  |                 |                      |     |
|--------------------------------------------------------|---------------|---------------------------------------------------------------------------------------------------------------------------------------------------------------------------------------------|------------------------------------------------------------------------------------------------------------------------------------------------------|------------------|-----------------|----------------------|-----|
| Kim et al. 2012 <sup>34</sup><br>PMID:<br>22932993     | Retrospective | OHCA patients older than 15 years who were treated with mild hypothermia and underwent a brain MRI for prognostic purposes were identified                                                  | Not Specified                                                                                                                                        | NSE              | CPC 1&2 vs. 3-5 | 6 months post arrest | 43  |
| Kim et al. 2020 <sup>35</sup><br>PMID:<br>33002033     | Retrospective | Patients who underwent at least one NSE value measurement between 48 and 72 hours after ROC and received both a brain CT scan within 24 hour after ROSC and DW-MRI within 7 days after ROSC | Age <18years old, CA due to trauma or intracranial hemorrhage, a previous history of neurological disease and CT or DW-MRI with a poor image quality | NSE              | CPC 1&2 vs. 3-5 | 6 months after CA    | 109 |
| Larsson et al. 2014 <sup>36</sup><br>PMID:<br>25260722 | Prospective   | Inclusion criteria were CA treated with TH and age > 18 years.                                                                                                                              | Not specified                                                                                                                                        | NSE, S100B, GFAP | CPC 1&2 vs. 3-5 | 6 months post arrest | 125 |

<sup>34</sup>Kim et al., (2012). *Neurocrit Care*. 17(3):412-20.

<sup>35</sup>Kim et al., (2020). *PLoS One*. 15(10):e0239979.

<sup>36</sup>Larsson et al., (2014). *Resuscitation*. 85(12):1654-61.

|                                                              |                    |                                                                                                                |                                                                                                                                                                                                                                                                                                                                                                                                                                                                                                                                                                                                                                                                                                                                                                                     |            |                                |                            |            |
|--------------------------------------------------------------|--------------------|----------------------------------------------------------------------------------------------------------------|-------------------------------------------------------------------------------------------------------------------------------------------------------------------------------------------------------------------------------------------------------------------------------------------------------------------------------------------------------------------------------------------------------------------------------------------------------------------------------------------------------------------------------------------------------------------------------------------------------------------------------------------------------------------------------------------------------------------------------------------------------------------------------------|------------|--------------------------------|----------------------------|------------|
| <p>Lascarrou et al. 2021<sup>37</sup><br/>PMID: 33301887</p> | <p>Prospective</p> | <p>Patients resuscitated after cardiac arrest in a non-shockable rhythm due to any cause, ≥18 years of age</p> | <p>Exclusion criteria were a no-flow time &gt; 10 minutes; a low-flow time (from initiation of CPR to ROSC) of more than 60 minutes; major hemodynamic instability (continuous epinephrine or norepinephrine infusion &gt;1 µg/Kg/min); time from cardiac arrest to screening of more than 300 minutes; moribund condition; Child–Pugh class C cirrhosis of the liver; pregnancy or breast-feeding; status of being under guardianship; status of being an inmate at a correctional facility; previous inclusion in another randomized, controlled trial involving patients with cardiac arrest in which the neurologic outcome at 90 days was assessed as the primary end point; lack of health insurance; and decision by the next of kin for the patient not to participate.</p> | <p>NSE</p> | <p>CPC 1&amp;2 vs. CPC 3-5</p> | <p>90 days post arrest</p> | <p>101</p> |
|--------------------------------------------------------------|--------------------|----------------------------------------------------------------------------------------------------------------|-------------------------------------------------------------------------------------------------------------------------------------------------------------------------------------------------------------------------------------------------------------------------------------------------------------------------------------------------------------------------------------------------------------------------------------------------------------------------------------------------------------------------------------------------------------------------------------------------------------------------------------------------------------------------------------------------------------------------------------------------------------------------------------|------------|--------------------------------|----------------------------|------------|

<sup>37</sup>Lascarrou et al., (2021). *Resuscitation*. 158:193-200.



|                                                     |               |                                                                                                                        |                                                                                                                                                                                                                                                                                      |     |                 |                                                |     |
|-----------------------------------------------------|---------------|------------------------------------------------------------------------------------------------------------------------|--------------------------------------------------------------------------------------------------------------------------------------------------------------------------------------------------------------------------------------------------------------------------------------|-----|-----------------|------------------------------------------------|-----|
| Leao et al. 2015 <sup>38</sup><br>PMID:<br>26761469 | Prospective   | Systolic BP >80,<br>GCS <9,                                                                                            | Patients with a core temperature lower than 30°C, coagulopathy, cryoglobulinemia, severe bleeding, intracerebral hemorrhage and known terminal illness were excluded.                                                                                                                | NSE | CPC 1&2 vs. 3-5 | 6 months (not specified if post d/c or arrest) | 67  |
| Lee et al. 2020 <sup>39</sup><br>PMID:<br>31187435  | Retrospective | Non-traumatic comatose cardiac arrest survivors >18years old who were treated with TH and for whom HbA1c was measured. | Transferred to another facility or died during TH, no measurement of HbA1c, treated with a target temperature other than 33 degrees Celsius and/or target duration other than 24h, received ECMO during post-cardiac arrest care or missing data regarding glucose levels during TH. | NSE | CPC 1&2 vs. 3-5 | 6 months after CA                              | 384 |

<sup>38</sup>Leao et al., (2015). *Rev Bras Ter Intensiva*. 27(4):322-32.

<sup>39</sup>Lee et al., (2020). *Neurocrit Care*. 32(2):448-458.

|                                                    |               |                                   |                                                                                                                                                                                                                                                                                                                                                                                                                                                                        |     |                     |                              |     |
|----------------------------------------------------|---------------|-----------------------------------|------------------------------------------------------------------------------------------------------------------------------------------------------------------------------------------------------------------------------------------------------------------------------------------------------------------------------------------------------------------------------------------------------------------------------------------------------------------------|-----|---------------------|------------------------------|-----|
| Lee et al. 2021 <sup>40</sup><br>PMID:<br>34302037 | Retrospective | OHCA patients<br>>18 years of age | Confirmation of hemorrhagic or ischemic stroke as the cause of cardiac arrest, CPC of 3 or 4 before cardiac arrest, body temperature <30 °C upon arrival, non-provision of post-resuscitation care, including TTM, meaningful response to verbal commands following ROSC, non-measurement of serum NSE level at 48 or 72 h after ROSC, non-assessment of FOUR score or GCS score after ROSC, initial GCS score >8, WLST, and unknown neurological outcome at 6 months. | NSE | CPC 1&2 vs. CPC 3-5 | 6 months post-cardiac arrest | 475 |
|----------------------------------------------------|---------------|-----------------------------------|------------------------------------------------------------------------------------------------------------------------------------------------------------------------------------------------------------------------------------------------------------------------------------------------------------------------------------------------------------------------------------------------------------------------------------------------------------------------|-----|---------------------|------------------------------|-----|

<sup>40</sup>Lee et al., (2021). *Sci Rep.* 11(1):15607

|                                                               |               |                                                                                                                                                                                                                                                                                                                                                                             |                                                                                                   |     |                 |                       |     |
|---------------------------------------------------------------|---------------|-----------------------------------------------------------------------------------------------------------------------------------------------------------------------------------------------------------------------------------------------------------------------------------------------------------------------------------------------------------------------------|---------------------------------------------------------------------------------------------------|-----|-----------------|-----------------------|-----|
| Martens et al. 1996 <sup>41</sup><br>PMID:<br>8808372         | Prospective   | Patients who sustained cardiac arrest (out of hospital or in hospital) who did not wake up shortly after ROSC.                                                                                                                                                                                                                                                              | Patients dying due to cardiac failure before level of consciousness could be adequately assessed. | NSE | Survival        | At discharge from ICU | 34  |
| Martinez-Losas et al. 2020 <sup>42</sup><br>PMID:<br>30857978 | Retrospective | In and out of hospital CA survivors of suspected cardiac origin, irrespective of initial rhythm and cooled to 32 degrees to 34 degrees for 24 hours, confirmation of both persistent comatose state after ROSC and absence of contraindications for TTM, and had at least 1 serum NSE determination during hospitalization and did not die within 72 hours after admission. | Not specified                                                                                     | NSE | CPC 1&2 vs. 3-5 | 3 months after CA     | 320 |

<sup>41</sup>Martens (1996). *Acad Emerg Med.* 3(2):126-31.

<sup>42</sup>Martinez-Losas et al., (2020). *Rev Esp Cardiol (Engl Ed).* 73(2):123-130.

|                                                            |               |                                                                                                                                                                              |                                                                                                                          |                                                              |                 |                                                                                                                         |     |
|------------------------------------------------------------|---------------|------------------------------------------------------------------------------------------------------------------------------------------------------------------------------|--------------------------------------------------------------------------------------------------------------------------|--------------------------------------------------------------|-----------------|-------------------------------------------------------------------------------------------------------------------------|-----|
| Mattsson et al.<br>2017 <sup>43</sup><br>PMID:<br>28981963 | Prospective   | The TTM trial was a prospective study of effects of targeted temperature management at 33C versus 36C in patients who were unconscious after out-of-hospital cardiac arrest. | Not specified                                                                                                            | NSE, Tau (NSE not included in analyses to avoid duplication) | CPC 1&2 vs. 3-5 | 6 months post CA                                                                                                        | 689 |
| Meisner et al.<br>2020 <sup>44</sup><br>PMID:<br>30397762  | Retrospective | Patients successfully resuscitated from non-traumatic cardiac arrest outside of the hospital.                                                                                | Patients who died within 8 hours, with missing information on the temperature profile or who were under 18 years of age. | NSE                                                          | GOS 3-5 vs. 1&2 | Time of transfer out of the ICU                                                                                         | 149 |
| Mortberg et al.<br>2011 <sup>45</sup><br>PMID:<br>22092212 | Prospective   | Patients resuscitated from CA of age >18 years, systolic pressure >80mmHg for more than 5 min after ROSC and unconscious with GCS <7 and included within 6h after CA.        | Patients with terminal disease.                                                                                          | Tau                                                          | CPC 1&2 vs. 3-5 | At discharge and 6 months after CA. The higher of the 2 CPC scores were used for patients who died after ICU discharge. | 22  |

<sup>43</sup>Mattsson et al., (2017). *Ann Neurol.* 82(5):665-675.

<sup>44</sup>Meisner et al., (2020). *Med Klin Intensivmed Notfmed.* 115(1):43-51.

<sup>45</sup>Mortberg et al., (2011). *Acta Anaesthesiol Scand.* 55(9):1132-8.

|                                                              |               |                                                                                                                                                                                                                                                                                   |                                                                                                                                                                                                                                                              |                                                                           |                     |                              |     |
|--------------------------------------------------------------|---------------|-----------------------------------------------------------------------------------------------------------------------------------------------------------------------------------------------------------------------------------------------------------------------------------|--------------------------------------------------------------------------------------------------------------------------------------------------------------------------------------------------------------------------------------------------------------|---------------------------------------------------------------------------|---------------------|------------------------------|-----|
| Moseby-Knappe et al. 2019 <sup>46</sup><br>PMID:<br>30383090 | Prospective   | Patients 18 years or older who were unconscious (GCS <8) on admission to hospital after out-of-hospital cardiac arrest of presumed cardiac cause, irrespective of the initial rhythm. Eligible patients had more than 20 consecutive minutes of ROSC.                             | Interval from the return of spontaneous circulation to screening of more than 240 minutes, unwitnessed arrest with asystole as the initial rhythm, suspected or known acute intracranial hemorrhage or stroke and a body temperature of <30 degrees Celcius. | NSE, S100B, NF-L, Tau (NSE not included in analyses to avoid duplication) | CPC 1&2 vs. 3-5     | 6 months after CA            | 717 |
| Moseby-Knappe et al. 2021 <sup>47</sup><br>PMID:<br>34417831 | Retrospective | Patients 18 years of age or older who were unconscious (GCS <8) on admission to the hospital after out-of-hospital cardiac arrest of presumed cardiac cause, irrespective of the initial rhythm. More than 20 consecutive minutes of spontaneous circulation after resuscitation. | An interval from the return of spontaneous circulation to screening of more than 240 minutes, unwitnessed arrest with asystole as the initial rhythm, suspected or known acute intracranial hemorrhage or stroke, and a body temperature of less than 30°C.  | NSE, S100B, Nf-L, Tau, UCH-L1, GFAP                                       | CPC 1&2 vs. CPC 3-5 | 6 months post-cardiac arrest | 717 |

<sup>46</sup>Moseby-Knappe et al., (2019). *JAMA Neurol.* 76(1):64-71.

<sup>47</sup>Moseby-Knappe et al., (2021). *Intensive Care Med.* 47(9):984-994.

|                                                         |               |                                                                                                                                                                                                    |                                                                                                                                                                                                                                                                                        |     |                     |                     |     |
|---------------------------------------------------------|---------------|----------------------------------------------------------------------------------------------------------------------------------------------------------------------------------------------------|----------------------------------------------------------------------------------------------------------------------------------------------------------------------------------------------------------------------------------------------------------------------------------------|-----|---------------------|---------------------|-----|
| Nakstad et al. 2020 <sup>48</sup><br>PMID:<br>31926258  | Prospective   | Patients $\geq 18$ years old, comatose (GCS $<9$ ) OHCA patients of cardiac and non-cardiac causes with stable ROSC ( $>20$ min).                                                                  | OHCA following trauma/acute onset intra-cerebral pathology, CPR $<5$ min followed by spontaneous awakening, OUHU admission $>6$ h after OHCA and treatment withdrawal in the ED (based on an abstain-from-resuscitation wish, terminal cancer disease, or very advanced age/dementia). | NSE | CPC 1&2 vs. 3-5     | 6 months after OHCA | 259 |
| Okasanen et al. 2009 <sup>49</sup><br>PMID:<br>18954930 | Retrospective | Out-of-hospital VF of presumed cardiac origin, witnessed arrest, age $\geq 18$ years, basic life support delayed less than 15min, ROSC less than 35 min and unresponsiveness at hospital admission | Persistent hypotension (MAP $<65$ mmHg for $>30$ min) despite therapy, pregnancy, terminal illness, pre-arrest illness limiting follow-up (e.g. Dementia) or DNR order.                                                                                                                | NSE | CPC 1&2 vs. 3-5     | 6 months after CA   | 90  |
| Peluso et al. 2021 <sup>50</sup><br>PMID:<br>34356123   | Retrospective | Adult patients ( $>18$ years) who remained with a Glasgow coma scale (GCS) $<9$ after hospital admission and were admitted into the intensive care unit (ICU).                                     | Patients with early deaths or awakening ( $<24$ h) who did not have at least two prognostic tools assessed.                                                                                                                                                                            | NSE | CPC 1&2 vs. CPC 3-5 | 3 months after CA   | 137 |

<sup>48</sup>Nakstad et al., (2020). *Resuscitation*. 149:170-179.

<sup>49</sup>Okasanen et al., (2009). *Resuscitation*. 80(2):165-70.

<sup>50</sup>Peluso et al., (2021). *Brain Sci*. 11(7):888.

|                                                           |             |                                                                                                                                      |                                                                                                                                                                                                                                                                                                                                                                             |            |                                   |                      |    |
|-----------------------------------------------------------|-------------|--------------------------------------------------------------------------------------------------------------------------------------|-----------------------------------------------------------------------------------------------------------------------------------------------------------------------------------------------------------------------------------------------------------------------------------------------------------------------------------------------------------------------------|------------|-----------------------------------|----------------------|----|
| Pfeifer et al.<br>2005 <sup>51</sup><br>PMID:<br>15797275 | Prospective | Patients who arrived at our ICU within 12hours after ROSC and survived for a minimum of 48h                                          | Not specified                                                                                                                                                                                                                                                                                                                                                               | NSE, S100B | GOS 3-5 vs. 1&2                   | 28 days after CPR    | 97 |
| Prohl et al.<br>2007 <sup>52</sup><br>PMID:<br>17414735   | Prospective | Glasgow Coma scale $\leq 3$                                                                                                          | Patients were excluded if the observed interval between collapse and the start of cardiopulmonary resuscitation had lasted for >15 mins. Excluded in ROSC could not be achieved in 60minutes. Patients with previous cardiac arrest and with known or co-existing neurologic disorders or neoplasms of the amine precursor uptake and decarboxylation system were excluded. | NSE, S100B | CPC 1-3 vs. 4&5                   | 6-months post arrest | 80 |
| Rana et al.<br>2012 <sup>53</sup><br>PMID:<br>22322567    | Prospective | Witnessed out of hospital CA of presumed cardiac origin                                                                              | Presence of previous neurological disease or pregnancy                                                                                                                                                                                                                                                                                                                      | NSE, S100B | GOS 3-5 vs. 1&2; mGOS 3-5 vs. 1&2 | 6 months after CA    | 97 |
| Rana et al.<br>2013 <sup>54</sup><br>PMID:<br>23287695    | Prospective | Age 18-80 years old, witnessed out of hospital CA of presumed cardiac origin, absence of previous neurological disease and pregnancy | Not specified                                                                                                                                                                                                                                                                                                                                                               | NF-L       | mGOS 3-5 vs. 1&2                  | 6 months after CPR   | 61 |

<sup>51</sup>Pfeifer et al., (2005). *Resuscitation*. 65(1):49-55.

<sup>52</sup>Prohl et al., (2007). *Crit Care Med*. 35(5):1230-7.

<sup>53</sup>Rana et al., (2012). *Clin Res Cardiol*. 101(7):533-43

<sup>54</sup>Rana et al., (2013). *Int J Cardiol*. 168(2):1322-7

|                                                         |               |                                                                                                                                                                                                     |                                                                                                                                                       |            |                 |                                                                                                |    |
|---------------------------------------------------------|---------------|-----------------------------------------------------------------------------------------------------------------------------------------------------------------------------------------------------|-------------------------------------------------------------------------------------------------------------------------------------------------------|------------|-----------------|------------------------------------------------------------------------------------------------|----|
| Roger et al. 2015 <sup>55</sup><br>PMID:<br>26324761    | Retrospective | Our inclusion criteria included adult patients ( 18 years) successfully resuscitated following OHCA and admitted to ICUs                                                                            | In-hospital cardiac arrest patients and patients who died before ICU admission were excluded                                                          | NSE        | CPC 1&2 vs. 3-5 | 6 months post CA                                                                               | 80 |
| Rosen et al. 2001 <sup>56</sup><br>PMID:<br>11382525    | Prospective   | Patients with OHCA                                                                                                                                                                                  | Patients with a fatal outcome within 24 h were not included in the study. (17 patients with cardiac arrests were not included for technical reasons.) | NSE, S100B | GOS 3-5 vs. 1&2 | Days 14, 45, 90 and 365 post arrest - used the best recorded result at any of the examinations | 65 |
| Rossetti et al. 2012 <sup>57</sup><br>PMID:<br>22323758 | Prospective   | Consecutive comatose adults admitted between December 2009 and April 2011 to the Department of Intensive Care Medicine of our hospital, after successful resuscitation from CA, and treated with TH | Patients diagnosed as being in brain death upon rewarming, or without signs of EEG activity (“flat recording”), were not included in the study        | NSE        | CPC 1&2 vs. 3-5 | 3 months from discharge                                                                        | 61 |
| Ruivo et al. 2016 <sup>58</sup><br>PMID:<br>27374413    | Retrospective | Comatose adults (unable to follow verbal commands after ROSC) aged ≥18 years admitted to the ICU with ROSC after in-hospital or out-of-hospital CA who were treated by TH                           | Patients without known time of CA, in a comatose state before CA, or with a terminal illness that preceded CA were excluded                           | NSE        | CPC 1&2 vs. 3-5 | 6 months post discharge                                                                        | 15 |

<sup>55</sup>Roger et al., (2015). *Anaesth Crit Care Pain Med.* 34(4):231-7.

<sup>56</sup>Rosen et al., (2001). *Resuscitation.* 49(2):183-91.

<sup>57</sup>Rossetti et al., (2012). *Neurology.* 78(111):796-802.

<sup>58</sup>Ruivo et al., (2016). *Rev Port Cardiol.* 35(7-8):423-31.



|                                                          |               |                                                                                                                                                          |                                                                                                                                                                                       |     |                     |                                                     |     |
|----------------------------------------------------------|---------------|----------------------------------------------------------------------------------------------------------------------------------------------------------|---------------------------------------------------------------------------------------------------------------------------------------------------------------------------------------|-----|---------------------|-----------------------------------------------------|-----|
| Ryczek et al. 2021 <sup>59</sup><br>PMID:<br>34125928    | Prospective   | OHCA patients who remained unconscious at first presentation with a Glasgow Coma Scale score $\leq 8$ .                                                  | Not specified                                                                                                                                                                         | NSE | CPC 1&2 vs. CPC 3-5 | Discharge (ICU or hospital discharge not specified) | 82  |
| Ryoo et al. 2020 <sup>60</sup><br>PMID:<br>31936049      | Retrospective | Age >18 years; OHCA; unconsciousness after ROSC; treated with TTM                                                                                        | Intracranial hemorrhage, acute stroke, DNR, pre-arrest cerebral dysfunction, severe comorbidity and expected death within 180 days                                                    | NSE | CPC 1&2 vs. 3-5     | 28 days after cardiac arrest                        | 160 |
| Samaniego et al. 2011 <sup>61</sup><br>PMID:<br>20680517 | Prospective   | Age 18 years or older, successful cardiopulmonary resuscitation and persistent coma defined as: no eye opening to voice and inability to follow commands | Pre-existing “do not resuscitate” status, severe coexisting systemic disease with a limited life expectancy, and brain death, patients who died within 72h of initial cardiac arrest. | NSE | GOS 3-5 vs. 1&2     | 3 months post arrest                                | 85  |

<sup>59</sup>Ryczek et al.,(2021). *Kardiologia Polska*. 79(5):546-553.

<sup>60</sup>Ryoo et al., (2020). *J Clin Med*. 9(1):159.

<sup>61</sup>Samaniego et al., (2011). *Neurocritical Care*. 15(1):113-9.

|                                                            |               |                                                                                                                              |                                                                                                                                                                                                                                                                                                                                                                           |     |                 |                                     |    |
|------------------------------------------------------------|---------------|------------------------------------------------------------------------------------------------------------------------------|---------------------------------------------------------------------------------------------------------------------------------------------------------------------------------------------------------------------------------------------------------------------------------------------------------------------------------------------------------------------------|-----|-----------------|-------------------------------------|----|
| Scheel et al. 2013 <sup>62</sup><br>PMID:<br>23566292      | Retrospective | Cranial CT within first seven days following cardiac arrest                                                                  | Thirteen patients were excluded from further analysis for findings that would have biased measurement of Hounsfield units and GWR calculation (only contrast enhanced CCT available (3), hydrocephalus and shunt artifact (3), severe movement artifacts (2), intracerebral hemorrhage (3), old large ischemic lesion (1), massive calcification of the basal ganglia (1) | NSE | CPC 1&2 vs. 3-5 | ICU Discharge                       | 98 |
| Schoerhuber et al. 1999 <sup>63</sup><br>PMID:<br>10436107 | Prospective   | Adult patients aged 18-75 years admitted after witnessed, non traumatic, normothermic, in- or out of hospital cardiac arrest | No ROSC could be achieved or if spontaneous circulation returned within the first minute of collapse                                                                                                                                                                                                                                                                      | NSE | CPC 1&2 vs. 3-5 | Best CPC within 6 months after ROSC | 56 |

<sup>62</sup>Scheel et al., (2013). *Scand J Trauma Resusc Emerg Med.* 21:23.

<sup>63</sup>Schoerhuber et al., (1999). *Stroke.* 30(8):1598-603.

|                                                        |               |                                                                                                                                                                                                                                             |                                                                                                                      |     |                 |                    |     |
|--------------------------------------------------------|---------------|---------------------------------------------------------------------------------------------------------------------------------------------------------------------------------------------------------------------------------------------|----------------------------------------------------------------------------------------------------------------------|-----|-----------------|--------------------|-----|
| Schrage et al. 2019 <sup>64</sup><br>PMID:<br>30654013 | Retrospective | Patients admitted for ECMO treatment of cardiogenic shock or refractory cardiac arrest and prior CPR. Only patients with ECMO implantation within 6h after CPR or ECMO implantation during active CPR and with available NSE were selected. | Patients who were awake within 24h after the index event and patients who decreased within 24h after the index event | NSE | CPC 1-3 vs. 4&5 | Hospital discharge | 129 |
|--------------------------------------------------------|---------------|---------------------------------------------------------------------------------------------------------------------------------------------------------------------------------------------------------------------------------------------|----------------------------------------------------------------------------------------------------------------------|-----|-----------------|--------------------|-----|

<sup>64</sup>Schrage et al., (2019). *Resuscitation*. 136:14-20.

|                                                                  |                    |                                                                                                                                                                                                                                                                                                                                                                                                                                                                                                                    |                                                                                                                                                                                                                                                                                                      |                   |                            |                                                                                                                                                                                                                                                                                                                                                                |           |
|------------------------------------------------------------------|--------------------|--------------------------------------------------------------------------------------------------------------------------------------------------------------------------------------------------------------------------------------------------------------------------------------------------------------------------------------------------------------------------------------------------------------------------------------------------------------------------------------------------------------------|------------------------------------------------------------------------------------------------------------------------------------------------------------------------------------------------------------------------------------------------------------------------------------------------------|-------------------|----------------------------|----------------------------------------------------------------------------------------------------------------------------------------------------------------------------------------------------------------------------------------------------------------------------------------------------------------------------------------------------------------|-----------|
| <p>Shinozaki et al. 2009<sup>65</sup><br/>PMID:<br/>19535196</p> | <p>Prospective</p> | <p>All patients presented with either out-of-hospital or in-hospital non-traumatic CA were included if they met the definition for "survived event" who remained unconscious (GCS≤8) and age ≥18 years. "Survived event" in the out-of-hospital setting indicates sustained spontaneous circulation following ROSC until admission and transfer of care to the medical staff at the receiving hospital. In the in-hospital setting, "survived event" means sustained circulation following ROSC for &gt;20min.</p> | <p>Death before admission or within 20 min after ROSC, age under 17 years, previously known irreversible brain damage (CPC 3-4 before CA event), recovery of consciousness (GCS≥9) soon after ROSC until admission, patients whose CPC were not evaluated due to death under analgesic sedation.</p> | <p>NSE, S100B</p> | <p>CPC 1&amp;2 vs. 3-5</p> | <p>Best-ever achieved CPC within 6 months from the onset of CA in cases "discharged alive" and best-ever achieved CPC for the time period between onset of CA and in-hospital death in cases "discharged dead." In cases of "discharged dead within 24h after CA," the patients who had no consciousness were classified into "poor neurological outcome."</p> | <p>80</p> |
|------------------------------------------------------------------|--------------------|--------------------------------------------------------------------------------------------------------------------------------------------------------------------------------------------------------------------------------------------------------------------------------------------------------------------------------------------------------------------------------------------------------------------------------------------------------------------------------------------------------------------|------------------------------------------------------------------------------------------------------------------------------------------------------------------------------------------------------------------------------------------------------------------------------------------------------|-------------------|----------------------------|----------------------------------------------------------------------------------------------------------------------------------------------------------------------------------------------------------------------------------------------------------------------------------------------------------------------------------------------------------------|-----------|

<sup>65</sup>Shinozaki et al., (2009). *Resuscitation*. 80(8):870-5.

|                                                        |               |                                                                                                                                                                       |                                                                                                                                                                                                                                                                                            |            |                     |                                                     |     |
|--------------------------------------------------------|---------------|-----------------------------------------------------------------------------------------------------------------------------------------------------------------------|--------------------------------------------------------------------------------------------------------------------------------------------------------------------------------------------------------------------------------------------------------------------------------------------|------------|---------------------|-----------------------------------------------------|-----|
| Son et al. 2020 <sup>66</sup><br>PMID:<br>32164225     | Retrospective | Adult comatose out-of-hospital cardiac arrest survivors treated with TTM, patients with collected NSE levels who underwent brain imaging (CT, MRI or both) after ROSC | Patients aged <18 years, patients with traumatic CA, patients with an interrupted TTM, patients not eligible for TTM, patients administered extracorporeal membrane oxygenation and patients ineligible for lumbar puncture.                                                               | NSE        | CPC 1&2 vs. 3-5     | 3 months after CA                                   | 58  |
| Song et al. 2010 <sup>67</sup><br>PMID:<br>20047785    | Prospective   | Patients who presented with CA                                                                                                                                        | Gained ROSC before arriving to ED, did not receive CPR due to DNR order, were regarded as dead on arrival or were pregnant                                                                                                                                                                 | S100B      | Survival            | 1 month after CA                                    | 151 |
| Song et al. 2021 <sup>68</sup><br>PMID:<br>33922191    | Retrospective | Non-traumatic comatose OHCA adult survivors >18 years of age and treated with TTM                                                                                     | Ineligible for TTM, who failed to maintain a temperature of 33°C during TTM due to unstable hemodynamics, whose TTM initiation was performed 6 h after ROSC, who had insufficient laboratory data obtained <6 h after ROSC, or those who had missing information at the time of CA or CPR. | NSE        | CPC 1&2 vs. CPC 3-5 | 3 months after ROSC                                 | 106 |
| Stammet et al. 2013 <sup>69</sup><br>PMID:<br>23684684 | Prospective   | Unconscious on admission, GCS <8                                                                                                                                      | Not Specified                                                                                                                                                                                                                                                                              | NSE, S100B | CPC 1&2 vs. 3-5     | 6 months (not specified if post arrest or post d/c) | 75  |

<sup>66</sup>Son et al., (2020). *J Clin Med.* 9(3):744.

<sup>67</sup>Song et al., (2010). *Resuscitation.* 81(3):337-42.

<sup>68</sup>Song et al., (2021). *J Clin Med.* 10(9):1825.

<sup>69</sup>Stammet et al., (2013). *J Am Coll Cardiol.* 62(9):851-8.

|                                                        |             |                                                                                                                                                                                                                                                       |                                                                                                                                                                                                                                                              |       |                 |                                                     |     |
|--------------------------------------------------------|-------------|-------------------------------------------------------------------------------------------------------------------------------------------------------------------------------------------------------------------------------------------------------|--------------------------------------------------------------------------------------------------------------------------------------------------------------------------------------------------------------------------------------------------------------|-------|-----------------|-----------------------------------------------------|-----|
| Stammet et al. 2015 <sup>70</sup><br>PMID:<br>25975474 | Prospective | Patients 18 years or older who were unconscious (GCS <8) on admission to hospital after out-of-hospital cardiac arrest of presumed cardiac cause, irrespective of the initial rhythm. Eligible patients had more than 20 consecutive minutes of ROSC. | Interval from the return of spontaneous circulation to screening of more than 240 minutes, unwitnessed arrest with asystole as the initial rhythm, suspected or known acute intracranial hemorrhage or stroke and a body temperature of <30 degrees Celsius. | NSE   | CPC 1&2 vs. 3-5 | 6 months after CA                                   | 686 |
| Stammet et al. 2017 <sup>71</sup><br>PMID:<br>28629472 | Prospective | Patients 18 years or older who were unconscious (GCS <8) on admission to hospital after out-of-hospital cardiac arrest of presumed cardiac cause, irrespective of the initial rhythm. Eligible patients had more than 20 consecutive minutes of ROSC. | Not Specified                                                                                                                                                                                                                                                | S100B | CPC 1&2 vs. 3-5 | 6 months (not specified if post arrest or post d/c) | 687 |

<sup>70</sup>Stammet et al., (2015). *J Am Coll Cardiol.* 65(19):2104-14.

<sup>71</sup>Stammet et al., (2017). *Crit Care.* 21(1):153.

|                                                             |               |                                                                                                                                                         |                                                                                                                                                       |     |                 |                                                 |      |
|-------------------------------------------------------------|---------------|---------------------------------------------------------------------------------------------------------------------------------------------------------|-------------------------------------------------------------------------------------------------------------------------------------------------------|-----|-----------------|-------------------------------------------------|------|
| Stefanizzi et al. 2020 <sup>72</sup><br>PMID:<br>32575355   | Retrospective | 25 cardiac arrest patients with either a good (CPC 1) or poor (CPC 5) neurological outcome at 6 months were enrolled in this study.                     | Not specified                                                                                                                                         | NSE | CPC 1 vs. 5     | Six months (post-CA or discharge not specified) | 50   |
| Steffen et al. 2010 <sup>73</sup><br>PMID:<br>20403168      | Retrospective | Not Specified                                                                                                                                           | Not Specified                                                                                                                                         | NSE | CPC 1&2 vs. 3-5 | ICU discharge                                   | 230  |
| Storm et al. 2012 <sup>74</sup><br>PMID:<br>22284447        | Prospective   | Thirty-five consecutive patients resuscitated from cardiac arrest were included in the study.                                                           | Not specified                                                                                                                                         | NSE | CPC 1&2 vs. 3-5 | Discharge from ICU                              | 35   |
| Streitberger et al. 2017 <sup>75</sup><br>PMID:<br>28426467 | Retrospective | Shockable or non-shockable rhythm, TTM,                                                                                                                 | Not Specified                                                                                                                                         | NSE | CPC 1&2 vs. 3-5 | At ICU discharge                                | 1053 |
| Sugita et al. 2017 <sup>76</sup><br>PMID:<br>28950909       | Prospective   | Patients who achieved ROSC from OHCA and who were brought to the emergency and critical care department, regardless of cardiac or non-cardiac etiology. | Informed consent not obtained, cases of multiple trauma, end stage malignancy, death in the ED, bedridden prior to hospitalization and <18 years old. | NSE | CPC 1&2 vs. 3-5 | 90 days after ROSC                              | 128  |

<sup>72</sup>Stefanizzi et al., (2020). *Int J Mol Sci.* 21(12):4353.

<sup>73</sup>Steffen et al., (2010). *Crit Care.* 14(2):R69.

<sup>74</sup>Storm et al., (2012). *Scand J Trauma Resusc Emerg Med.* 20:6.

<sup>75</sup>Streitberger et al., (2017). *Crit Care Med.* 45(7):1145-1151.

<sup>76</sup>Sugita et al., (2017). *Crit Care.* 21(1):247.

|                                                    |             |                                          |                                                                                                                                                                                                                                                                                |            |          |                     |    |
|----------------------------------------------------|-------------|------------------------------------------|--------------------------------------------------------------------------------------------------------------------------------------------------------------------------------------------------------------------------------------------------------------------------------|------------|----------|---------------------|----|
| Tat et al. 2019 <sup>77</sup><br>PMID:<br>30650128 | Prospective | Between ages of 18-85 and cardiac arrest | Age under 18 or over 85, pregnancy, trauma, acute bleeding from non-traumatic condition, re-arrest with unsuccessful resuscitation within 6 hours of hospital arrival, arrest secondary to hypothermia, terminal neoplastic disease, inmates, and absence of informed consent. | NSE, S100B | Survival | 30 days post arrest | 40 |
|----------------------------------------------------|-------------|------------------------------------------|--------------------------------------------------------------------------------------------------------------------------------------------------------------------------------------------------------------------------------------------------------------------------------|------------|----------|---------------------|----|

<sup>77</sup>Tat- *et al.*, (2019). *PLoS One*. 14(1):e0210666.



|                                                           |             |                                                                                                                                                                                                                                                                                                                                                         |                                                                                                                                                                                                                                                                                                                                                                                                                                                                                                         |            |                 |                         |    |
|-----------------------------------------------------------|-------------|---------------------------------------------------------------------------------------------------------------------------------------------------------------------------------------------------------------------------------------------------------------------------------------------------------------------------------------------------------|---------------------------------------------------------------------------------------------------------------------------------------------------------------------------------------------------------------------------------------------------------------------------------------------------------------------------------------------------------------------------------------------------------------------------------------------------------------------------------------------------------|------------|-----------------|-------------------------|----|
| Tiainen et al.<br>2003 <sup>78</sup><br>PMID:<br>14631087 | Prospective | All adult patients aged 18-75 years of age, witnessed out of hospital CA, ventricular fibrillation or non-perfusing tachycardia as initial rhythm, presumed cardiac origin of arrest, estimated interval of 5-15min from collapse to first attempt at resuscitation by emergency medical personnel and an interval of <60minutes from collapse to ROSC. | Presence of emergency medical personnel, CA from intoxication or trauma, response to verbal command after ROSC and before randomization, tympanic temperature <30 degrees celsius on admission, evidence of hypotension (MAP <60mmHg) for >30min after ROSC and before randomization, evidence of hypoxia (arterial O2 sat <85%) for >15 minutes after ROSC and before randomization, a terminal illness, pre-existing coagulopathy, pregnancy, unavailable for follow-up, enrollment in another study. | NSE, S100B | CPC 1&2 vs. 3-5 | 6 months after CA       | 70 |
| Tsetsou et al.<br>2018 <sup>79</sup><br>PMID:<br>28337603 | Prospective | Patients older than 18 years successfully resuscitated after CA (in-hospital: out-of-hospital CA ratio was 1:10), who were managed with TTM at 36degrees C in the medical-surgical intensive care unit                                                                                                                                                  | Patients that died within 24 h after CA were excluded                                                                                                                                                                                                                                                                                                                                                                                                                                                   | NSE        | CPC 1&2 vs. 3-5 | 3 months from discharge | 61 |

<sup>78</sup>Tiainen *et al.*, (2003). *Stroke*. 34(12):2881-2886

<sup>79</sup>Tsetsou *et al.*, (2018). *Neurocrit Care*. 28(1):104-109

|                                                           |               |                                                                                                                                                                             |                                                                                                                                                                                                                                                                      |                  |                     |                                   |     |
|-----------------------------------------------------------|---------------|-----------------------------------------------------------------------------------------------------------------------------------------------------------------------------|----------------------------------------------------------------------------------------------------------------------------------------------------------------------------------------------------------------------------------------------------------------------|------------------|---------------------|-----------------------------------|-----|
| Wihersaari et al. 2019 <sup>80</sup><br>PMID:<br>31022497 | Prospective   | OHCA patients who were unconscious and admitted to Finnish ICU, those with biomarkers                                                                                       | Not Specified                                                                                                                                                                                                                                                        | NSE              | CPC 1&2 vs. 3-5     | 12 months post arrest             | 249 |
| Wihersaari et al. 2021 <sup>81</sup><br>PMID:<br>32852582 | Prospective   | 120 comatose OHCA patients resuscitated from an initial shockable rhythm                                                                                                    | Not Specified                                                                                                                                                                                                                                                        | NF-L             | CPC 1&2 vs. 3-5     | 6 months after CA                 | 112 |
| Wurm et al., 2021 <sup>82</sup><br>PMID:<br>34342833      | Retrospective | Patients were included with a Glasgow Coma Scale score of 3 at admission and when the reason for cardiac arrest was either cardiac, respiratory, hemodynamic, or metabolic. | Patients were excluded when there was a history of previous cardiac arrest, neurological disorders or central nervous system neoplasms, psychiatric illness, substance abuse including alcohol, and the ongoing use of psychotropic medications.                     | NSE, S100B, Nf-L | CPC 1&2 vs. CPC 3-5 | 6 months following cardiac arrest | 70  |
| You et al. 2019 <sup>83</sup><br>PMID:<br>31585184        | Prospective   | OHCA patients >18 years old who had been treated using TTM                                                                                                                  | Patients with traumatic cardiac arrest, patients ineligible for lumbar puncture (ie. Brain CT showed severe cerebral edema, obliteration of the basal cisterns or an occult intracranial mass lesion), patients receiving ECMO, relatives unable to consent to an LP | NSE              | CPC 1&2 vs. 3-5     | 6 months after ROSC               | 34  |

<sup>80</sup>Wihersaari et al., (2019). *Resuscitation*. 139:214-221.

<sup>81</sup>Wihersaari et al., (2021). *Intensiv Care Med*. 47(1):39-48.

<sup>82</sup>Wurm et al., (2021). *Neurocrit Care*. Doi: 10.1007/s12028-021-01321-1

<sup>83</sup>You et al., (2019). *Resuscitation*. 145:185-191.

|                                                        |               |                                                                                                                                                                                                                                 |                                                                                                                                                                                                                                      |            |                 |                         |     |
|--------------------------------------------------------|---------------|---------------------------------------------------------------------------------------------------------------------------------------------------------------------------------------------------------------------------------|--------------------------------------------------------------------------------------------------------------------------------------------------------------------------------------------------------------------------------------|------------|-----------------|-------------------------|-----|
| Zellner et al. 2013 <sup>84</sup><br>PMID:<br>23528678 | Retrospective | Coma after cardiac arrest with ROSC. Patients needed to be 18 years or older. Furthermore the decision to apply TH needed to be made by the attending physician. The patients also needed to survive the first night in the ICU | Patients with do-not-resuscitate/-do-not-intubate orders after initial cardiopulmonary resuscitation(CPR) and patients with in-hospital cardiac arrests in the operating room, the catheterization lab, on an ICU or with telemetry. | NSE, S100B | CPC 1&2 vs. 3-5 | 6 months post discharge | 123 |
| Zhai et al. 2020 <sup>85</sup><br>PMID:<br>32802436    | Retrospective | All emergency department OHCA patients who achieved ROSC.                                                                                                                                                                       | Pre-arrest cognitive impairment, existing terminal illness, missing data regarding baseline characteristics, or outcome                                                                                                              | NSE        | Survival        | Hospital discharge      | 61  |
| Zingler et al. 2003 <sup>86</sup><br>PMID:<br>12584414 | Prospective   | Not Specified                                                                                                                                                                                                                   | Hypothermia (<35C)                                                                                                                                                                                                                   | NSE, S100B | CPC 1-3 vs. 4&5 | 12 weeks post arrest    | 27  |

<sup>84</sup>Zellner et al., (2013). *Resuscitation*. 84(10):1382-6.

<sup>85</sup>Zhai et al., (2020). *J Thorac Dis*. 12(7):3573-3581.

<sup>86</sup>Zingler et al., (2003). *Eur Neurol*. 49(2):79-84.

**eTable 2. Receiver Operator Characteristic Curve Analysis for the Diagnostic Accuracy of Brain Biomarkers for Predicting Unfavorable outcome at 48 hours in patients where outcome was determined  $\geq 3$  months following cardiac arrest.**

|               | <b>AUC</b> | <b>95% CI's</b> |
|---------------|------------|-----------------|
| <b>NSE</b>    | 0.83       | 0.75 – 0.89     |
| <b>S100B</b>  | 0.85       | 0.76 – 0.90     |
| <b>GFAP</b>   | 0.81       | 0.46 – 0.96     |
| <b>Nf-L</b>   | 0.92       | 0.88 – 0.95     |
| <b>Tau</b>    | 0.86       | 0.73 – 0.93     |
| <b>UCH-L1</b> | 0.88       | 0.52 – 0.99     |

**eTable 3. Concentration thresholds for each biomarker.** Concentration threshold and corresponding sensitivity to achieve 95% & 100% specificity for each biomarker. Values are derived from the SROCs presented in the main analysis (Figure 2).

| <b>Biomarker</b> | <b>Specificity Cut-Off</b> | <b>Sensitivity</b> | <b>Concentration Threshold<br/>(ug/L or pg/mL)</b> |
|------------------|----------------------------|--------------------|----------------------------------------------------|
| NSE              | 95%                        | 55%                | 46.7                                               |
|                  | 100%                       | 6%                 | 455                                                |
| S100B            | 95%                        | 56%                | 0.287                                              |
|                  | 100%                       | 5%                 | 5.95                                               |
| GFAP             | 95%                        | 52%                | 287                                                |
|                  | 100%                       | 11%                | 33392                                              |
| NF-L             | 95%                        | 78%                | 553                                                |
|                  | 100%                       | 21%                | 44766                                              |
| Tau              | 95%                        | 64%                | 91.5                                               |
|                  | 100%                       | 2.9%               | 8176                                               |
| UCH-L1           | 95%                        | 64%                | 583                                                |
|                  | 100%                       | 6%                 | 11644                                              |

**eTable 4. Studies including outcome determination at times other than hospital discharge and 6-months.**

| <b>Study</b>                                | <b>Outcome determination</b>                        | <b>Sample size</b>                    |
|---------------------------------------------|-----------------------------------------------------|---------------------------------------|
| Barbella et al. 2020; PMID: 32044334        | 3 months post CA                                    | 158                                   |
| Bongiovanni et al. 2020; PMID: 32016534     | 3 months after CA                                   | 485                                   |
| Bottiger et al. 2001; PMID: 11390339        | 14 days post ROSC                                   | 66                                    |
| Clifford-Mobley et al. 2020; PMID: 31615270 | ICU discharge                                       | 142                                   |
| Daubin et al. 2011; PMID: 21824428          | 3 months post CA                                    | 97                                    |
| Derwall et al. 2009; PMID: 19368739         | 14 days post ROSC                                   | 68                                    |
| Deye et al. 2020; PMID: 32858156            | At hospital discharge and 3 months after CA         | 330                                   |
| Disanto et al. 2019; PMID: 31375414         | 1 month after CA                                    | 14                                    |
| Einav et al. 2012; PMID: 22813607           | Within 24hr of discharge                            | 195                                   |
| Hasper et al. 2009; PMID: 19874577          | ICU Discharge                                       | 171                                   |
| Helwig et al. 2017; PMID: 28054291          | 4 weeks after CPR                                   | 100                                   |
| Jang et al. 2019; PMID: 30732223            | 3 months post CA                                    | 97                                    |
| Kang et al. 2021; PMID: 33917473            | 3 months after ROSC                                 | 45                                    |
| Lascarrou et al. 2021; PMID: 33301887       | 90 days post arrest                                 | 101                                   |
| Martens et al. 1996; PMID: 8808372          | At discharge from ICU                               | 34                                    |
| Martinez-Losas et al. 2020; PMID: 30857978  | 3 months after CA                                   | 320                                   |
| Meisner et al. 2020; PMID: 30397762         | Time of transfer out of the ICU                     | 149                                   |
| Peluso et al. 2021; PMID: 34356123          | 3 months after CA                                   | 137                                   |
| Pfeifer et al. 200; PMID: 15797275          | 28 days after CPR                                   | 97                                    |
| Rosen et al. 2001; PMID: 11382525           | Days 14, 45, 90 and 365 post arrest                 | 65                                    |
| Rossetti et al. 2012; PMID: 22323758        | 3 months from discharge                             | 61                                    |
| Ryczek et al. 2021; PMID: 34125928          | Discharge (ICU or hospital discharge not specified) | 82                                    |
| Ryoo et al. 2020; PMID: 31936049            | 28 days after cardiac arrest                        | 160                                   |
| Samaniego et al. 2011; PMID: 20680517       | 3 months post arrest                                | 85                                    |
| Scheel et al. 2013; PMID: 23566292          | ICU Discharge                                       | 98                                    |
| Son et al. 2020; PMID: 32164225             | 3 months after CA                                   | 58                                    |
| Song et al. 2010; PMID: 20047785            | 1 month after CA                                    | 151                                   |
| Song et al. 2021; PMID: 33922191            | 3 months after ROSC                                 | 106                                   |
| Steffen et al. 2010; PMID: 20403168         | ICU discharge                                       | 230                                   |
| Storm et al. 2012; PMID: 22284447           | Discharge from ICU                                  | 35                                    |
| Streitberger et al. 2017; PMID: 28426467    | At ICU discharge                                    | 1053                                  |
| Sugita et al. 2017; PMID: 28426467          | 90 days after ROSC                                  | 128                                   |
| Tat et al. 2019; PMID: 30650128             | 30 days post arrest                                 | 40                                    |
| Tsetsou et al. 2018; PMID: 28337603         | 3 months from discharge                             | 61                                    |
| Wihersaari et al. 2019; PMID: 31022497      | 12 months post arrest                               | 249                                   |
| Zingler et al. 2003; PMID: 12584414         | 12 weeks post arrest                                | 27                                    |
| <b>36 studies (41.9% of total)</b>          |                                                     | <b>5495 patients (52.0% of total)</b> |

CA, Cardiac arrest; CPR, cardiopulmonary resuscitation; ICU, Intensive care unit; ROSC, return of spontaneous circulation

**eTable 5. Studies including survival versus death as an outcome.**

| <b>Study</b>                                | <b>Sample size</b>                  |
|---------------------------------------------|-------------------------------------|
| Auer et al. 2006; PMID: 17175624            | 17                                  |
| Clifford-Mobley et al. 2020; PMID: 31615270 | 142                                 |
| Disanto et al. 2019; PMID: 31375414         | 14                                  |
| Einav et al. 2013; PMID: 23391666           | 158                                 |
| Elmer et al. 2016; PMID: 26457752           | 86                                  |
| Huang et al. 2016; PMID: 27256246           | 99                                  |
| Martens et al. 1996; PMID: 8808372          | 34                                  |
| Song et al. 2010; PMID: 20047785            | 151                                 |
| Tat et al. 2019; PMID: 30650128             | 40                                  |
| Zhai et al. PMID: 32802436                  | 61                                  |
| <b>10 studies (11.6% of total)</b>          | <b>802 patients (7.6% of total)</b> |

## e-REFERENCES

1. Adler C, Onur OA, Braumann S, et al. Absolute serum neurofilament light chain levels and its early kinetics predict brain injury after out-of-hospital cardiac arrest. *J Neurol*. 2021. doi:10.1007/s00415-021-10722-3
2. Akin M, Garcheva V, Sieweke JT, et al. Neuromarkers and neurological outcome in out-of-hospital cardiac arrest patients treated with therapeutic hypothermia-experience from the HAnnover COoling REgistry (HACORE). *PLoS One*. 2021;16(1):e024510. doi:10.1371/journal.pone.0245210
3. Auer J, Berent R, Weber T, et al. Ability of neuron-specific enolase to predict survival to hospital discharge after successful cardiopulmonary resuscitation. *Can J Emerg Med*. 2006;8(1):13-18.
4. Barbella G, Novy J, Marques-Vidal P, Oddo M, Rossetti AO. Added value of somatosensory evoked potentials amplitude for prognostication after cardiac arrest. *Resuscitation*. 2020;149(July 2019):17-23. doi:10.1016/j.resuscitation.2020.01.025
5. Bongiovanni F, Romagnosi F, Barbella G, et al. Standardized EEG analysis to reduce the uncertainty of outcome prognostication after cardiac arrest. *Intensive Care Med*. 2020;46(5):963-972. doi:10.1007/s00134-019-05921-6
6. Böttiger BW, Möbes S, Glätzer R, et al. Astroglial protein S-100 is an early and sensitive marker of hypoxic brain damage and outcome after cardiac arrest in humans. *Circulation*. 2001;103(22):2694-2698. doi:10.1161/01.CIR.103.22.2694
7. Choi S, Park K, Ryu S, et al. Use of S-100B, NSE, CRP and ESR to predict neurological outcomes in patients with return of spontaneous circulation and treated with hypothermia. *Emerg Med J*. 2016;33(10):690-695. doi:10.1136/emered-2015-205423
8. Chung-Esaki HM, Mui G, Mlynash M, Eyngorn I, Catabay K, Hirsch KG. The neuron specific enolase (NSE) ratio offers benefits over absolute value thresholds in post-cardiac arrest coma prognosis. *J Clin Neurosci*. 2018;57:99-104. doi:10.1016/j.jocn.2018.08.020
9. Clifford-Mobley O, Palmer F, Rooney K, Skorko A, Bayly G. Serum neuron-specific enolase measurement for neuro-prognostication post out-of-hospital cardiac arrest: Determination of the optimum testing strategy in routine clinical use. *Ann Clin Biochem*. 2020;57(1):69-76. doi:10.1177/0004563219886326
10. Daubin C, Quentin C, Allouche S, et al. Serum neuron-specific enolase as predictor of outcome in comatose cardiac-arrest survivors: A prospective cohort study. *BMC Cardiovasc Disord*. 2011;11:1-13. doi:10.1186/1471-2261-11-48
11. Derwall M, Stoppe C, Brücken D, Rossaint R, Fries M. Changes in S-100 protein serum levels in survivors of out-of-hospital cardiac arrest treated with mild therapeutic hypothermia: A prospective, observational study. *Crit Care*. 2009;13(2):1-7. doi:10.1186/cc7785
12. Deye N, Nguyen P, Vodovar N, et al. Protein S100B as a reliable tool for early prognostication after cardiac arrest. *Resuscitation*. 2020;156:251-259.



doi:10.1016/j.resuscitation.2020.08.010

13. Disanto G, Prosperetti C, Gobbi C, et al. Serum neurofilament light chain as a prognostic marker in postanoxic encephalopathy. *Epilepsy Behav.* 2019;101:106432. doi:10.1016/j.yebeh.2019.07.033
14. Duez CHV, Grejs AM, Jeppesen AN, et al. Neuron-specific enolase and S-100b in prolonged targeted temperature management after cardiac arrest: A randomised study. *Resuscitation.* 2018;122:79-86. doi:10.1016/j.resuscitation.2017.11.052
15. Ebner F, Moseby-Knappe M, Mattsson-Carlgrén N, et al. Serum GFAP and UCH-L1 for the prediction of neurological outcome in comatose cardiac arrest patients. *Resuscitation.* 2020;(May):1-8. doi:10.1016/j.resuscitation.2020.05.016
16. Einav S, Kaufman N, Algur N, Kark JD. Modeling serum biomarkers S100 beta and neuron-specific enolase as predictors of outcome after out-of-hospital cardiac arrest: An aid to clinical decision making. *J Am Coll Cardiol.* 2012;60(4):304-311. doi:10.1016/j.jacc.2012.04.020
17. Einav S, Kaufman N, Algur N, Strauss-Liviatan N, Kark JD. Brain biomarkers and management of uncertainty in predicting outcome of cardiopulmonary resuscitation: A nomogram paints a thousand words. *Resuscitation.* 2013;84(8):1083-1088. doi:10.1016/j.resuscitation.2013.01.031
18. Elmer J, Jeong K, Abebe KZ, et al. Serum neutrophil gelatinase-associated lipocalin predicts survival after resuscitation from cardiac arrest. *Crit Care Med.* 2016;44(1):111-119. doi:10.1097/CCM.0000000000001357
19. Gillick K, Rooney K. Serial NSE measurement identifies non-survivors following out of hospital cardiac arrest. *Resuscitation.* 2018;128(December 2017):24-30. doi:10.1016/j.resuscitation.2018.04.010
20. Gulay O, Aydin D, Erbuyun K, et al. Neurological outcome after cardiac arrest: a prospective study of the predictive ability of prognostic biomarkers neuron-specific enolase, glial fibrillary acidic protein, S-100B, and procalcitonin. *Turk J Med Sci.* 2017;46(5):1459-1468.
21. Hasper D, von Haehling S, Storm C, Jörres A, Schefold JC. Changes in serum creatinine in the first 24 hours after cardiac arrest indicate prognosis: An observational cohort study. *Crit Care.* 2009;13(5):1-7. doi:10.1186/cc8144
22. Hasslacher J, Lehner GF, Harler U, et al. Secretoneurin as a marker for hypoxic brain injury after cardiopulmonary resuscitation. *Intensive Care Med.* 2014;40(10):1518-1527. doi:10.1007/s00134-014-3423-4
23. Hasslacher J, Rass V, Beer R, et al. Serum tau as a predictor for neurological outcome after cardiopulmonary resuscitation. *Resuscitation.* 2020;148(January):207-214. doi:10.1016/j.resuscitation.2020.01.022
24. Hayashida H, Kaneko T, Kasaoka S, et al. Comparison of the predictability of neurological outcome by serum procalcitonin and glial fibrillary acidic protein in postcardiac-arrest patients. *Neurocrit Care.* 2010;12(2):252-257. doi:10.1007/s12028-009-

25. Helwig K, Seeger F, Hölschermann H, et al. Elevated Serum Glial Fibrillary Acidic Protein (GFAP) is Associated with Poor Functional Outcome After Cardiopulmonary Resuscitation. *Neurocrit Care*. 2017;27(1):68-74. doi:10.1007/s12028-016-0371-6
26. Hoiland RL, Ainslie PN, Wellington CL, et al. Brain hypoxia is associated with neuroglial injury in humans post-cardiac arrest. *Circ Res*. 2021;129(5):583-597.
27. Huang CH, Tsai MS, Chien KL, et al. Predicting the outcomes for out-of-hospital cardiac arrest patients using multiple biomarkers and suspension microarray assays. *Sci Rep*. 2016;6(January):1-10. doi:10.1038/srep27187
28. Huesgen KW, Elmelige YO, Yang Z, et al. Ultra-early serum concentrations of neuronal and astroglial biomarkers predict poor neurological outcome after out-of-hospital cardiac arrest—a pilot neuroprognostic study. *Resusc Plus*. 2021;7(January 2021):100133. doi:10.1016/j.resplu.2021.100133
29. Hunziker S, Quinto A, Ramin-Wright M, et al. Serum neurofilament measurement improves clinical risk scores for outcome prediction after cardiac arrest: results of a prospective study. *Crit Care*. 2021;25(1):1-14. doi:10.1186/s13054-021-03459-y
30. Jakkula P, Hästbacka J, Reinikainen M, et al. Near-infrared spectroscopy after out-of-hospital cardiac arrest. *Crit Care*. 2019;23(1):1-8. doi:10.1186/s13054-019-2428-3
31. Jang JH, Park W Bin, Lim YS, et al. Combination of S100B and procalcitonin improves prognostic performance compared to either alone in patients with cardiac arrest: A prospective observational study. *Med (United States)*. 2019;98(6):1-8. doi:10.1097/MD.00000000000014496
32. Kaneko T, Fujita M, Ogino Y, Yamamoto T, Tsuruta R, Kasaoka S. Serum neutrophil gelatinase-associated lipocalin levels predict the neurological outcomes of out-of-hospital cardiac arrest victims. *BMC Cardiovasc Disord*. 2017;17(1):1-6. doi:10.1186/s12872-017-0545-y
33. Kang C, Jeong W, Park JS, et al. Comparison of prognostic performance between neuron-specific enolase and s100 calcium-binding protein b obtained from the cerebrospinal fluid of out-of-hospital cardiac arrest survivors who underwent targeted temperature management. *J Clin Med*. 2021;10(7). doi:10.3390/jcm10071531
34. Kim J, Choi BS, Kim K, et al. Prognostic performance of diffusion-weighted MRI combined with NSE in comatose cardiac arrest survivors treated with mild hypothermia. *Neurocrit Care*. 2012;17(3):412-420. doi:10.1007/s12028-012-9773-2
35. Kim SH, Kim HJ, Park KN, et al. Neuron-specific enolase and neuroimaging for prognostication after cardiac arrest treated with targeted temperature management. *PLoS One*. 2020;15(10 October):1-13. doi:10.1371/journal.pone.0239979
36. Larsson IM, Wallin E, Kristofferzon ML, Niessner M, Zetterberg H, Rubertsson S. Post-cardiac arrest serum levels of glial fibrillary acidic protein for predicting neurological outcome. *Resuscitation*. 2014;85(12):1654-1661. doi:10.1016/j.resuscitation.2014.09.007

37. Lascarrou JB, Mialhe AF, le Gouge A, et al. NSE as a predictor of death or poor neurological outcome after non-shockable cardiac arrest due to any cause: Ancillary study of HYPERION trial data. *Resuscitation*. 2021;158(November):193-200. doi:10.1016/j.resuscitation.2020.11.035
38. Leão RN, Ávila P, Cavaco R, Germano N, Bento L. Hipotermia terapêutica após parada cardíaca: Preditores de prognóstico. *Rev Bras Ter Intensiva*. 2015;27(4):322-332. doi:10.5935/0103-507X.20150056
39. Lee BK, Lee DH, Jeung KW, Yun SW, Callaway CW, Rittenberger JC. Glycated Hemoglobin is Associated with Glycemic Control and 6-Month Neurologic Outcome in Cardiac Arrest Survivors Undergoing Therapeutic Hypothermia. *Neurocrit Care*. 2020;32(2):448-458. doi:10.1007/s12028-019-00758-9
40. Lee JH, Kim YH, Lee JH, et al. Combination of neuron-specific enolase measurement and initial neurological examination for the prediction of neurological outcomes after cardiac arrest. *Sci Rep*. 2021;11(1):1-9. doi:10.1038/s41598-021-94555-0
41. Martens P. Serum neuron-specific enolase as a prognostic marker for irreversible brain damage in comatose cardiac arrest survivors. *Acad Emerg Med*. 1996;3(2):126-131.
42. Martínez-Losas P, López de Sá E, Armada E, et al. Neuron-specific enolase kinetics: an additional tool for neurological prognostication after cardiac arrest. *Rev Española Cardiol (English Ed)*. 2020;73(2):123-130. doi:10.1016/j.rec.2019.01.008
43. Mattsson N, Zetterberg H, Nielsen N, et al. Serum tau and neurological outcome in cardiac arrest. *Ann Neurol*. 2017;82(5):665-675. doi:10.1002/ana.25067
44. Meißner S, Nuding S, Schröder J, Werdan K, Ebel H. Relationship between body temperature, neuron-specific enolase, and clinical course in patients after out-of-hospital cardiac arrest. *Medizinische Klin - Intensivmed und Notfallmedizin*. 2020;115(1):43-51. doi:10.1007/s00063-018-0508-9
45. Mörtberg E, Zetterberg H, Nordmark J, Blennow K, Rosengren L, Rubertsson S. S-100B is superior to NSE, BDNF and GFAP in predicting outcome of resuscitation from cardiac arrest with hypothermia treatment. *Resuscitation*. 2011;82(1):26-31. doi:10.1016/j.resuscitation.2010.10.011
46. Moseby-Knappe M, Mattsson N, Nielsen N, et al. Serum Neurofilament Light Chain for Prognosis of Outcome After Cardiac Arrest. *JAMA Neurol*. 2019;76(1):64-71. doi:10.1001/jamaneurol.2018.3223
47. Moseby-Knappe M, Mattsson-Carlsson N, Stammet P, et al. Serum markers of brain injury can predict good neurological outcome after out-of-hospital cardiac arrest. *Intensive Care Med*. 2021;47(9):984-994. doi:10.1007/s00134-021-06481-4
48. Nakstad ER, Staer-Jensen H, Wimmer H, et al. Late awakening, prognostic factors and long-term outcome in out-of-hospital cardiac arrest - results of the prospective Norwegian Cardio-Respiratory Arrest Study (NORCAST). *Resuscitation*. 2020. doi:10.1016/j.resuscitation.2019.12.031
49. Oksanen T, Tiainen M, Skrifvars MB, et al. Predictive power of serum NSE and OHCA

- score regarding 6-month neurologic outcome after out-of-hospital ventricular fibrillation and therapeutic hypothermia. *Resuscitation*. 2009;80(2):165-170. doi:10.1016/j.resuscitation.2008.08.017
50. Peluso L, Boisdenghien T, Attanasio L, et al. Multimodal approach to predict neurological outcome after cardiac arrest: A single-center experience. *Brain Sci*. 2021;11(7):1-10. doi:10.3390/brainsci11070888
  51. Pfeifer R, Börner A, Krack A, Sigusch HH, Surber R, Figulla HR. Outcome after cardiac arrest: Predictive values and limitations of the neuroproteins neuron-specific enolase and protein S-100 and the Glasgow Coma Scale. *Resuscitation*. 2005;65(1):49-55. doi:10.1016/j.resuscitation.2004.10.011
  52. Prohl J, Röther J, Kluge S, et al. Prediction of short-term and long-term outcomes after cardiac arrest: A prospective multivariate approach combining biochemical, clinical, electrophysiological, and neuropsychological investigations. *Crit Care Med*. 2007;35(5):1230-1237. doi:10.1097/01.CCM.0000261892.10559.85
  53. Rana OR, Schröder JW, Kühnen JS, et al. The Modified Glasgow Outcome Score for the prediction of outcome in patients after cardiac arrest: A prospective clinical proof of concept study. *Clin Res Cardiol*. 2012;101(7):533-543. doi:10.1007/s00392-012-0423-7
  54. Rana OR, Schröder JW, Baukloh JK, et al. Neurofilament light chain as an early and sensitive predictor of long-term neurological outcome in patients after cardiac arrest. *Int J Cardiol*. 2013;168(2):1322-1327. doi:10.1016/j.ijcard.2012.12.016
  55. Roger C, Palmier L, Louart B, et al. Neuron specific enolase and Glasgow motor score remain useful tools for assessing neurological prognosis after out-of-hospital cardiac arrest treated with therapeutic hypothermia. *Anaesth Crit Care Pain Med*. 2015;34(4):231-237. doi:10.1016/j.accpm.2015.05.004
  56. Rosén H, Sunnerhagen KS, Herlitz J, Blomstrand C, Rosengren L. Serum levels of the brain-derived proteins S-100 and NSE predict long-term outcome after cardiac arrest. *Resuscitation*. 2001;49(2):183-191. doi:10.1016/S0300-9572(00)00348-8
  57. Rossetti AO, Carrera E, Oddo M. Early EEG correlates of neuronal injury after brain anoxia. *Neurology*. 2012;78(11):796-802. doi:10.1212/WNL.0b013e3182768eaf
  58. Ruivo C, Jesus C, Morais J, Viana P. Preditores de morte em doentes pós-paragem cardíaca submetidos a hipotermia terapêutica: experiência inicial de um centro não-terciário. *Rev Port Cardiol*. 2016;35(7-8):423-431. doi:10.1016/j.repc.2016.03.006
  59. Ryczek R, Kwasiborski PJ, Dymus J, et al. Neuron-specific enolase concentrations for the prediction of poor prognosis of comatose patients after out-of-hospital cardiac arrest: an observational cohort study. *Kardiol Pol*. 2021;79(5):546-553.
  60. Ryoo SM, Kim YJ, Sohn CH, Ahn S, Seo DW, Kim WY. Prognostic abilities of serial neuron-specific enolase and lactate and their combination in cardiac arrest survivors during targeted temperature management. *J Clin Med*. 2020;9(1):1-9. doi:10.3390/jcm9010159
  61. Samaniego EA, Mlynash M, Caulfield AF, Eynhorn I, Wijman CAC. Sedation confounds

- outcome prediction in cardiac arrest survivors treated with hypothermia. *Neurocrit Care*. 2011;15(1):113-119. doi:10.1007/s12028-010-9412-8
62. Scheel M, Storm C, Gentsch A, et al. The prognostic value of gray-white-matter ratio in cardiac arrest patients treated with hypothermia. *Scand J Trauma Resusc Emerg Med*. 2013;21(1):1-7. doi:10.1186/1757-7241-21-23
  63. Schoerhuber W, Kittler H, Sterz F, et al. Time Course of Serum Neuron-Specific Enolase: A predictor of neurological outcome in patients resuscitated from cardiac arrest. *Stroke*. 1999;30(8):1598-1603. doi:10.1161/01.str.30.8.1598
  64. Schrage B, Rübsamen N, Becher PM, et al. Neuron-specific-enolase as a predictor of the neurologic outcome after cardiopulmonary resuscitation in patients on ECMO. *Resuscitation*. 2019;136(October 2018):14-20. doi:10.1016/j.resuscitation.2019.01.011
  65. Shinozaki K, Oda S, Sadahiro T, et al. Serum S-100B is superior to neuron-specific enolase as an early prognostic biomarker for neurological outcome following cardiopulmonary resuscitation. *Resuscitation*. 2009;80:870-875. doi:10.1016/j.resuscitation.2009.05.005
  66. Son SH, Lee IH, Park JS, et al. Does combining biomarkers and brain images provide improved prognostic predictive performance for out-of-hospital cardiac arrest survivors before target temperature management? *J Clin Med*. 2020;9(3). doi:10.3390/jcm9030744
  67. Song KJ, Shin S Do, Ong MEH, Jeong JS. Can early serum levels of S100B protein predict the prognosis of patients with out-of-hospital cardiac arrest? *Resuscitation*. 2010;81(3):337-342. doi:10.1016/j.resuscitation.2009.10.012
  68. Song HG, Park JS, You Y, et al. Using out-of-hospital cardiac arrest (Ohca) and cardiac arrest hospital prognosis (cahp) scores with modified objective data to improve neurological prognostic performance for out-of-hospital cardiac arrest survivors. *J Clin Med*. 2021;10(9):1-12. doi:10.3390/jcm10091825
  69. Stammet P, Wagner DR, Gilson G, Devaux Y. Modeling serum level of s100 $\beta$  and bispectral index to predict outcome after cardiac arrest. *J Am Coll Cardiol*. 2013;62(9):851-858. doi:10.1016/j.jacc.2013.04.039
  70. Stammet P, Collignon O, Hassager C, et al. Neuron-specific enolase as a predictor of death or poor neurological outcome after out-of-hospital cardiac arrest and targeted temperature management at 33°C and 36°C. *J Am Coll Cardiol*. 2015;65(19):2104-2114. doi:10.1016/j.jacc.2015.03.538
  71. Stammet P, Dankiewicz J, Nielsen N, et al. Protein S100 as outcome predictor after out-of-hospital cardiac arrest and targeted temperature management at 33 °C and 36 °C. *Crit Care*. 2017;21(1):1-10. doi:10.1186/s13054-017-1729-7
  72. Stefanizzi FM, Nielsen N, Zhang L, et al. Circulating levels of brain-enriched micrnas correlate with neuron specific enolase after cardiac arrest—a substudy of the target temperature management trial. *Int J Mol Sci*. 2020;21(12):1-9. doi:10.3390/ijms21124353
  73. Steffen IG, Hasper D, Ploner CJ, et al. Mild therapeutic hypothermia alters neuron specific enolase as an outcome predictor after resuscitation: 97 prospective hypothermia

- patients compared to 133 historical non-hypothermia patients. *Crit Care*. 2010;14(2). doi:10.1186/cc8975
74. Storm C, Nee J, Jörres A, Leithner C, Hasper D, Ploner CJ. Serial measurement of neuron specific enolase improves prognostication in cardiac arrest patients treated with hypothermia: A prospective study. *Scand J Trauma Resusc Emerg Med*. 2012;20:1-6. doi:10.1186/1757-7241-20-6
  75. Streitberger KJ, Leithner C, Wattenberg M, et al. Neuron-Specific Enolase Predicts Poor Outcome after Cardiac Arrest and Targeted Temperature Management: A Multicenter Study on 1,053 Patients. *Crit Care Med*. 2017;45(7):1145-1151. doi:10.1097/CCM.0000000000002335
  76. Sugita A, Kinoshita K, Sakurai A, Chiba N, Yamaguchi J, Kuwana T. Systemic impact on secondary brain aggravation due to ischemia / reperfusion injury in post-cardiac arrest syndrome : a prospective observational study using high-mobility group box 1 protein. *Crit Care*. 2017;21(247):1-12. doi:10.1186/s13054-017-1828-5
  77. Tat RM, Golea A, Vesa ŞC, Ionescu D. Resistin—Can it be a new early marker for prognosis in patients who survive after a cardiac arrest? A pilot study. *PLoS One*. 2019;14(1):1-12. doi:10.1371/journal.pone.0210666
  78. Tiainen M, Roine RO, Pettilä V, Takkunen O. Serum Neuron-Specific Enolase and S-100B Protein in Cardiac Arrest Patients Treated with Hypothermia. *Stroke*. 2003;34(12):2881-2886. doi:10.1161/01.STR.0000103320.90706.35
  79. Tsetsou S, Novy J, Pfeiffer C, Oddo M, Rossetti AO. Multimodal Outcome Prognostication After Cardiac Arrest and Targeted Temperature Management: Analysis at 36 °C. *Neurocrit Care*. 2018;28(1):104-109. doi:10.1007/s12028-017-0393-8
  80. Wihersaari L, Tiainen M, Skrifvars MB, et al. Usefulness of neuron specific enolase in prognostication after cardiac arrest: Impact of age and time to ROSC. *Resuscitation*. 2019;139(April):214-221. doi:10.1016/j.resuscitation.2019.04.021
  81. Wihersaari L, Ashton NJ, Reinikainen M, et al. Neurofilament light as an outcome predictor after cardiac arrest: a post hoc analysis of the COMACARE trial. *Intensive Care Med*. 2021. doi:10.1007/s00134-020-06218-9
  82. Wurm R, Arfsten H, Muqaku B, et al. Prediction of Neurological Recovery After Cardiac Arrest Using Neurofilament Light Chain is Improved by a Proteomics-Based Multimarker Panel. *Neurocrit Care*. 2021. doi:10.1007/s12028-021-01321-1
  83. You Y, Park JS, Min J, et al. The usefulness of neuron-specific enolase in cerebrospinal fluid to predict neurological prognosis in cardiac arrest survivors who underwent target temperature management: A prospective observational study. *Resuscitation*. 2019;145(June 2019):185-191. doi:10.1016/j.resuscitation.2019.09.027
  84. Zellner T, Gärtner R, Schopohl J, Angstwurm M. NSE and S-100B are not sufficiently predictive of neurologic outcome after therapeutic hypothermia for cardiac arrest. *Resuscitation*. 2013;84(10):1382-1386. doi:10.1016/j.resuscitation.2013.03.021
  85. Zhai Q, Feng L, Zhang H, et al. Serial disseminated intravascular coagulation score with

neuron specific enolase predicts the mortality of cardiac arrest-a pilot study. *J Thorac Dis.* 2020;12(7):3573-3581. doi:10.21037/jtd-20-580

86. Zingler VC, Krumm B, Bertsch T, Fassbender K, Pohlmann-Eden B. Early prediction of neurological outcome after cardiopulmonary resuscitation: A multimodal approach combining neurobiochemical and electrophysiological investigations may provide high prognostic certainty in patients after cardiac arrest. *Eur Neurol.* 2003;49(2):79-84. doi:10.1159/000068503
